1 **Metabarcoding unsorted kick-samples facilitates macroinvertebrate-based**  
2 **biomonitoring with increased taxonomic resolution, while outperforming environmental**  
3 **DNA**

4  
5 **Running title: Metabarcoding unsorted kick-samples**

6  
7 **Authors:** Lyndall Pereira-da-Conceicao<sup>1,2,3\*</sup>, Vasco Elbrecht<sup>4,5</sup>, Andie Hall<sup>2</sup>, Andrew  
8 Briscoe<sup>2</sup>, Helen Barber-James<sup>3,6</sup>, Benjamin Price<sup>2</sup>

9  
10 **Affiliations**

- 11 1. Department of Natural Sciences, National Museums Scotland, Edinburgh, EH1 1JF,  
12 United Kingdom
- 13 2. Life Sciences Department, Natural History Museum, Cromwell Road, SW7 5BD,  
14 London, UK
- 15 3. Department of Freshwater Invertebrates, Albany Museum, Grahamstown, 6140, South  
16 Africa
- 17 4. Centre for Biodiversity Genomics, University of Guelph, 50 Stone Road East,  
18 Guelph, Ontario, N1G 2W1, Canada
- 19 5. Centre for Molecular Biodiversity Research, Zoological Research Museum Alexander  
20 Koenig, Adenauerallee 160, 53113 Bonn, Germany
- 21 6. Department of Zoology and Entomology, Rhodes University, Grahamstown, 6140,  
22 South Africa

23  
24

25 **Abstract**

26 Many studies have highlighted the potential of DNA-based methods for the biomonitoring of  
27 freshwater macroinvertebrates, however only a few studies have investigated homogenisation  
28 of bulk samples that include debris to reduce sample-processing time. In order to explore the  
29 use of DNA-based methods in water quality assessment in South Africa, this study compares  
30 morphological and molecular-based identification of freshwater macroinvertebrates at the  
31 mixed higher taxon and mOTU level while investigating abundance and comparing mOTU  
32 recovery with historical species records. From seven sites across three rivers in South Africa,  
33 we collected a biomonitoring sample, an intensive-search comprehensive sample and an  
34 eDNA sample per site. The biomonitoring sample was picked and scored according to  
35 standard protocols and the leftover debris and comprehensive samples were homogenised  
36 including all debris. DNA-based methods recovered higher diversity than morphology, but  
37 did not always recover the same taxa, even at the family level. Regardless of the differences  
38 in taxon scores, most DNA-based methods except some eDNA samples, returned the same  
39 water quality assessment category as the standard morphology-based assessment.  
40 Homogenised comprehensive samples recovered more freshwater invertebrate diversity than  
41 all other methods. The eDNA samples recovered 2 to 10 times more mOTUs than any other  
42 method, however 90% of reads were non-target and as a result eDNA recovered the lowest  
43 target diversity. However, eDNA did find some target taxa that the other methods failed to  
44 detect. This study shows that unsorted samples recover the same water quality scores as a  
45 morphology-based assessment and much higher diversity scores than both picked and eDNA  
46 samples. As a result, there is potential to integrate DNA-based approaches into existing  
47 metrics quickly while providing much more information for the development of more refined  
48 metrics at the species or mOTU level with distributional data which can be used for  
49 conservation and biodiversity management.

50

51

## 52 **Introduction**

53 The development of DNA-based identification methods for freshwater macroinvertebrates  
54 and their incorporation into biological monitoring programs is rapidly advancing, particularly  
55 due to the potential reductions in processing time, greater taxonomic resolution, and  
56 reduction in errors compared with current morphological monitoring methods (Hering et al.,  
57 2018). While morphological methods often have limited taxonomic resolution due to cryptic  
58 species, sex and life-stages, DNA-based methods can overcome these issues (Ekrem, Stur, &  
59 Hebert, 2010; Hebert, Ratnasingham, & de Waard, 2003; Park, Footitt, Maw, & Hebert,  
60 2011; Venter & Bezuidenhout, 2016) when paired with suitable DNA reference libraries. For  
61 bulk-collected samples, sample sorting and subsequent morphological identification is time-  
62 consuming, and depending on the taxonomic expertise and available identification resources,  
63 the same samples can produce different results (Dickens & Graham, 2002; Haase et al., 2006)  
64 and up to a third of specimens and a fifth of taxa can be missed during the sorting stage  
65 (Haase, Pauls, Schindehütte, & Sundermann, 2010).

66  
67 Within the last decade, a growing number of case-studies have highlighted the potential  
68 applications of DNA-based methods for the bioassessment of freshwater macroinvertebrates  
69 (Baird & Hajibabaei, 2012; Blackman et al., 2017; Carew, Pettigrove, Metzeling, &  
70 Hoffmann, 2013; Elbrecht & Leese, 2017; Elbrecht, Vamos, Meissner, Aroviita, & Leese,  
71 2017; Elbrecht, Vamos, Steinke, & Leese, 2017a; Hajibabaei, Shokralla, Zhou, Singer, &  
72 Baird, 2011; Packer, Gibbs, Sheffield, & Hanner, 2009; Pauls et al., 2014; Yu et al., 2012),  
73 the majority of which pick invertebrates from the total sample as the first step. Only a few  
74 freshwater macroinvertebrate studies have investigated homogenisation, either of cleaned  
75 bulk samples where debris is removed (e.g. Andújar et al., 2018; Dowle, Pochon, Banks,  
76 Shearer, & Wood, 2016; Gardham, Hose, Stephenson, & Chariton, 2014) or bulk samples  
77 which still include some debris (Majaneva, Diserud, Eagle, Hajibabaei & Ekrem, 2018) in  
78 order to remove the specimen sorting stage and reduce sample-processing time.

79  
80 In parallel, the use of environmental DNA (eDNA) is being explored to detect  
81 macroinvertebrates in freshwater environments. However, as eDNA is free of the organism  
82 and can be transported in flowing waters (Deiner & Altermatt, 2014), these data are spatially  
83 complex (Deiner, Fronhofer, Mächler, Walser & Altermatt, 2016). While eDNA-based  
84 studies have been shown to successfully detect macroinvertebrate community richness

85 (Deiner et al., 2017; Deiner, Walser, Mächler & Altermatt, 2016; Li et al., 2018; Mächler,  
86 Little, Wüthrich, Alther & Fronhofer, 2019) some studies have shown a much lower detection  
87 level of invertebrates when compared to morphological methods (Hajibabaei et al., 2019;  
88 Macher et al., 2018). These differences can be a result of several factors including DNA  
89 shedding rates, persistence and movement in the environment (Barnes & Turner, 2016),  
90 sampling, laboratory and bioinformatic biases as outlined in Blackman et al (2019).

91

92 In addition to the sample processing and bioinformatic biases, DNA based methods are often  
93 limited by the lack of DNA reference libraries (Carew et al., 2017; Porter & Hajibabaei,  
94 2018; Weigand et al., 2019), particularly in regions with high biodiversity and endemism  
95 (e.g. South Africa: Venter & Bezuidenhout, 2016). While large proportions of global  
96 biodiversity remain unknown (Stork, 2018), freshwater ecosystems are considered to be  
97 among the ecosystems most threatened by global climate change (Bates et al., 2008) and  
98 severe pressure from other anthropogenic impacts (Dallas & Rivers-Moore, 2014).

99 Freshwater resources in Africa are highly impacted, and in South Africa, 57% of river and  
100 75% of wetland ecosystems are highly threatened (Dallas & Rivers-Moore, 2014; Darwall,  
101 Smith, Tweddle, & Skelton, 2009; Driver, Sink, Nel, Holness, Van Niekerk, Daniels, Jonas,  
102 Majiedt, Harris, and Maze, 2012; Nel et al., 2011). A more in-depth knowledge of the current  
103 biodiversity would greatly improve our ability to inform decisions (Hamer, 2013) and is a  
104 critical factor hindering freshwater conservation in Africa (Barber-James & Pereira-da-  
105 Conceicoa, 2016).

106

107 While biological monitoring using freshwater macroinvertebrates is used worldwide, the  
108 indices are used at various taxon levels, with many indices only using family (or higher) level  
109 identification (e.g. South Africa: Dickens & Graham, 2002; Tanzania: Kaaya, Day, & Dallas,  
110 2015; Namibia: Palmer & Taylor, 2004). However, such coarse taxonomic resolution has  
111 been shown to overlook the varying tolerances at generic or species levels, which can be used  
112 to make more well-informed water management decisions (e.g. Barber-James & Pereira-da-  
113 Conceicoa, 2016; Macher et al., 2016).

114

115 Within South Africa, rivers are currently monitored using the South African Scoring System  
116 (SASS version 5) protocol (Dickens & Graham, 2002) which uses freshwater  
117 macroinvertebrates as a measure of stream ecosystem health. Organisms are identified to a

118 mixed taxon (typically family) level (Fig. S1) and are assigned a quality score based on  
119 pollution sensitivity (Dickens & Graham, 2002). The abundance of organisms is roughly  
120 estimated into categories (where 1 = 1 individual, A = 2 - 10, B = 10 - 100, C = 100 - 1000, D  
121 > 1000) and recorded on the scoring sheet. Abundance is not used in the SASS calculations,  
122 but is used in other indices, such as the Macroinvertebrate Response Assessment Index  
123 (MIRAI, Thirion, 2007). SASS returns three principal indices: SASS Score (the total of  
124 quality scores for all taxa found in a sample), Number of Taxa and ASPT (Average Score Per  
125 Taxon = SASS Score divided by Number of Taxa) (Dickens & Graham, 2002). These scores  
126 are then standardised across South Africa using biological bands (A-E) calibrated for each  
127 ecoregion (Dallas, 2007; Dallas & Day, 2007; Kleynhans, Thirion, & Moolman, 2005;  
128 Omernik, 1987). Identification at the SASS level (i.e. the mixed higher taxon levels) is too  
129 coarse for biodiversity and ecological impact assessment, and should only be used as a red-  
130 flag indicator of changes in water quality of a monitored site (Dickens & Graham, 2002),  
131 however due to the lack of alternative methods SASS is frequently misused in southern  
132 Africa (Barber-James & Pereira-da-Conceicao, 2016). Data should be interpreted in relation  
133 to season of collection as some natural variation will occur throughout the year (Dickens &  
134 Graham, 2002) and seasonal data is required to capture a holistic view of the taxa occurring  
135 at a site.

136

137 In order to explore the use of DNA-based methods of assessment in South Africa, this study  
138 compares morphological and molecular-based identification of freshwater macroinvertebrates  
139 at the mixed higher taxon SASS level and at the level of the molecular operational taxonomic  
140 unit or “mOTU”. DNA metabarcoding of picked SASS samples, leftover SASS debris (after  
141 picking), intensive-search comprehensive samples and filtered water samples (eDNA) were  
142 compared with morphology. Three main aims were investigated: 1) which of the sampling  
143 and processing methods (picked SASS, leftover SASS, comprehensive sample or eDNA),  
144 recover the most similar SASS level taxa and scores as morphology; 2) The correlation  
145 between the abundance of picked samples and relative abundance of DNA sequence reads;  
146 and 3) Does DNA based mOTU recovery reflect historical records of species known from the  
147 region.

148

149

## 150 **Materials and Methods**

### 151 **Study sites and sampling strategy**

152 Samples were collected from seven sites across three Eastern Cape rivers, three sites along  
153 each of the Elandsbos (“E”) and Tyume tributary (“H”) rivers and one site on the Berg  
154 (“CD”) River (Fig. S2). River sites occurred across three ecoregions (Ecological Level 1 and  
155 geomorphological zone, (Dallas, 2007; Dallas, 2005) namely: Southeastern Coastal Belt (E =  
156 Elandsbos), upper Southeastern Uplands (H = Tyume tributary) and Southern Folded (CD =  
157 Berg). All sites sampled were selected based on the expected condition of good quality water  
158 in a natural or unmodified river condition.

159

160 At each site environmental DNA (eDNA) was collected from surface water using a sterile 1L  
161 bucket from five locations within a 5m radius of the sample site, and mixed in a sterile 20L  
162 bucket. Water was then filtered through three 0.22 µm polyethersulfone filters (Sterivex-GP)  
163 using a 50ml syringe. At each site water was filtered until the filter blocked or 2L was  
164 reached (total volume filtered ranged between 0.6 - 2L). Each filter was preserved onsite with  
165 96% ethanol and kept refrigerated where possible.

166

167 Following eDNA sampling a SASS sample was taken by an accredited river health  
168 practitioner, following the SASS protocol using a 30x30cm framed standard kicknet with a  
169 1mm mesh: a 2 minute kick-sample of stones-in-current across the river, 1 minute kick-  
170 sample of stones-out-of-current, 2m total marginal vegetation sweep and a 1 minute stir and  
171 sweep of gravel, sand and mud biotope (Dickens & Graham, 2002). SASS samples, including  
172 all debris (i.e. the entire kicknet contents), were preserved in 96% ethanol while in the field.  
173 As SASS samples were identified in the laboratory, rather than live in the field, the results are  
174 not comparable with other SASS data from these sites. In order to provide a more  
175 comprehensive assessment of the biodiversity at each site, whole community samples (here  
176 termed “Comprehensive”) were collected for 30 minutes using a 30x30cm framed kicknet  
177 with a 250µm mesh. The whole sample, including all debris was preserved in 96% ethanol  
178 while in the field.

179

### 180 **Sample processing (Fig. 1)**

181 SASS samples were scored by a single individual and identified according to SASS protocol  
182 (i.e. a total time of 45 minutes per sample for identification to family level). Invertebrates

183 from each sample were picked, morpho-sorted after scoring and then identified further if  
184 possible and counted (here termed “SASS picked”). A representative individual of each  
185 morpho-species from the SASS picked samples was removed as a voucher specimen.  
186 Vouchers were imaged before being placed in ATL buffer and proK overnight at 56 °C and  
187 DNA was extracted using the Qiagen BioSprint 96 DNA Blood Kit or the DNeasy Blood &  
188 Tissue Kit.

189  
190 The remainder of the picked morpho-species (SASS picked) samples were placed in 2ml  
191 tubes and dried using a DNA SpeedVac dna120 at high heat (65 °C) for one large sample  
192 (H4) and medium heat (43 °C) for all other samples. The SASS picked samples were then  
193 homogenised with three glass beads per 2 ml tube using the Qiagen TissueLyser II (30 Hz for  
194 1 minute) and digested overnight in 10:1 solution of ATL buffer and proK. Following  
195 digestion, three 200ul sub-samples were taken and extracted using the DNeasy Blood &  
196 Tissue kit with a double final elution resulting in 300ul DNA for each sub-sample. These sub-  
197 samples were then combined into a single extract of 900ul for each SASS picked sample  
198 from each site.

199  
200 The remainder of the SASS samples, consisting of debris and some macroinvertebrates (here  
201 termed “SASS leftover”) and the Comprehensive samples were homogenised in ethanol for  
202 up to 10 seconds using a consumer blender (Breville VBL062, 300 W, 600 ml). The blender  
203 blades and container were sterilized using 12% industrial bleach between samples. Both the  
204 blended Comprehensive and SASS leftover samples were then sub-sampled with two  
205 replicates of 10g homogenate per sub-sample. Samples were dried overnight at room  
206 temperature and DNA was extracted using concentrated proK (20mg/ml) with overnight  
207 digestion following Ransome et al. (2017) and then the Qiagen DNeasy PowerMax Soil kit  
208 with a final DNA elution of 5ml per sub-sample. For the eDNA samples, the Sterivex filters  
209 (three replicates per site, Fig. 1) were dried and DNA extracted using the Qiagen DNeasy  
210 PowerWater Sterivex kit, following the alternative method (using a microcentrifuge and not a  
211 vacuum manifold), and excluding the 90°C incubation and powerbead steps. All DNA  
212 concentrations were quantified using a NanoDrop 8000 (Thermo Fisher Scientific) and the  
213 concentration of DNA was adjusted to 25 ng/μl in the downstream PCRs.

214

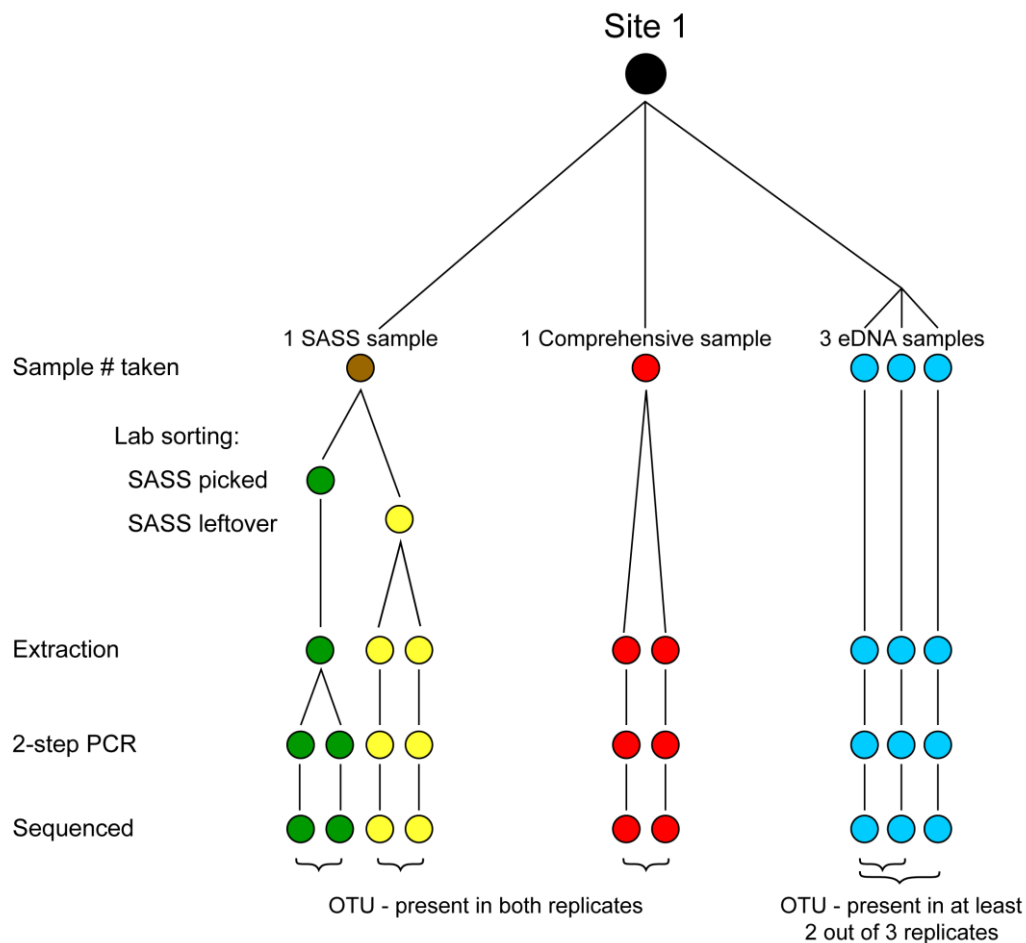

215

216 **Fig. 1.** Sampling strategy per river site showing laboratory procedures and the corresponding  
217 technical replicates used for the study.

218

### 219 Voucher barcoding

220 Voucher barcoding followed standard in-house protocols using LCO1490 and HCO2198  
221 primers (Folmer, Black, Hoeh, Lutz, & Vrijenhoek, 1994). Each reaction consisted of 1mM  
222 total dNTPs, 3mM MgCl<sub>2</sub>, 1.25u Bio-Taq DNA polymerase (Bioline), 0.1μM each primer  
223 and 1x reaction buffer. Cycling conditions were: initial denaturation 94°C for 1min followed  
224 by 35 cycles of 94°C for 30s, 50°C for 30s and 72°C for 30s, with a final elongation of 10min  
225 at 72°C. PCR products were visualised using gel electrophoresis, purified using Agencourt  
226 AMPure XP beads and then sequenced bi-directionally using BigDye terminator reaction mix  
227 v3.1 in a 3730xl DNA analyser (Applied Biosystems) at the NHM sequencing facility.  
228 Voucher data and corresponding sequences were uploaded to the Barcode of Life Data



229 System (BOLD) website (Ratnasingham & Herbert, 2007) and can be found under the project  
230 name “BEISA” in the public data portal.

231

### 232 **DNA metabarcoding**

233 DNA metabarcoding followed the 2-step PCR approach outlined in Elbrecht and Steinke  
234 (2018) using the BF2 / BR2 freshwater macroinvertebrate fusion primer sets developed for  
235 the Cytochrome c oxidase subunit I (COI) gene (Elbrecht & Leese, 2017). Each SASS picked  
236 extraction was amplified in duplicate, for other methods each technical replicate was  
237 independently amplified (two for Comprehensive and SASS leftover, and three for eDNA  
238 samples, Fig. 1).

239

240 Two-step PCRs were performed on each sample replicate using the Qiagen Multiplex PCR  
241 Plus Kit with 0.5 uM of each primer in a final volume of 25ul. PCRs were run on Techne™  
242 Prime Elite Thermal Cyclers (Thermo Fisher Scientific) with the following conditions, PCR  
243 1: 94 °C for 5 min; 25 cycles of 94 °C for 30s; 50 °C for 30s; 65 °C for 50s; and final  
244 extension at 65 °C for 5 min. The eDNA samples used 27 cycles rather than 25. Untailed BF2  
245 / BR2 primers were used for PCR 1. Then 1ul of amplicon from the initial PCR was used as a  
246 template for PCR 2 under the following conditions: 94 °C for 5 min; 13 cycles of 94 °C for  
247 30s; 50 °C for 30s; 65 °C for 2 min; and final extension at 65 °C for 5 min using the tailed  
248 BF2 / BR2 fusion primers (Elbrecht & Leese, 2017). One negative control was used in both  
249 PCR steps, PCR products were visualised using gel electrophoresis.

250

251 Following the second PCR, the tagged amplicons were purified using Agencourt AMPure XP  
252 beads at 0.8x ratio. The eDNA sample from site E3 was gel cut using the QIAquick Gel  
253 Extraction Kit to remove a non-target band. Following cleanup the DNA concentration of  
254 each individual library was measured with a SPECTROstar Nano (BMG Labtech) and then  
255 equimolar pooled with negative controls added at the maximum volume added for any single  
256 library (15ul).

257

258 The size-corrected concentration of the pooled libraries was determined following analysis  
259 with an Agilent 2200 TapeStation system and Qubit 2.0 Fluorometer (Invitrogen). The pool  
260 was loaded onto an Illumina MiSeq at 9pM, with 5% Phi-X, using a 600 cycle V3 kit with  
261 300 bp paired end sequencing (index read steps skipped).

## 262 **Bioinformatics**

263 Bioinformatics processing was performed using JAMP v0.66  
264 (<http://github.com/VascoElbrecht/JAMP>) with detailed scripts being available as supporting  
265 information (Scripts S1). Reads were demultiplexed using JAMP, and paired-end reads were  
266 merged using Usearch v8.1.1861 (Edgar, 2013) with relaxed settings to maximise the amount  
267 of reads merged (allowing up to 99 mismatches in the overlapping region). Where necessary,  
268 the reverse complement of the reads was generated, to ensure all sequences are present in the  
269 same orientation. BF2 and BR2 primers were then removed using cutadapt 1.18 with default  
270 settings (Martin, 2011), discarding reads where the primer sequences remained undetected.  
271 Only sequences of 411 to 431 bp were used for further analysis (filtered with cutadapt). Low-  
272 quality sequences were then filtered from all samples, using fastq\_filter with maxee = 1  
273 (Edgar & Flyvbjerg, 2015). Sequences from all samples were then pooled, dereplicated  
274 (minuniquesize = 2), and clustered into molecular operational taxonomic units (mOTUs),  
275 using cluster\_otus with a 97% identity threshold (Edgar, 2013) which includes chimera  
276 removal. Pre-filtered reads for all samples were de-replicated again, but singletons were  
277 included to maximise the information extracted from the sequence data. Sequences from each  
278 sample were matched against the mOTUs with a minimum match of 97% using  
279 usearch\_global.  
280 For each sample only mOTUs with a read abundance above 0.01% in at least two sequencing  
281 replicates were considered for downstream analyses using a 3% divergence threshold which  
282 is consistent with other studies and observations of real invertebrate communities (e.g.,  
283 Elbrecht, Peinert, & Leese, 2016; Elbrecht, Vamos, Steinke, & Leese, 2017b; Hajibabaei,  
284 Janzen, Burns, Hallwachs, & Hebert, 2006).  
285  
286 Taxonomy was assigned to remaining mOTUs using an R script to search against both BOLD  
287 and NCBI databases. The taxonomy assigned mOTU table was then filtered by Phylum to  
288 include targeted taxa (Arthropoda, Annelida, Porifera, Coelenterata, Turbellaria, Hydracarina,  
289 Gastropoda and Pelecypoda), taxonomy was further validated and checked, removing any  
290 terrestrial invertebrates. Any conflicting assignments between BOLD and NCBI were  
291 handled individually and unresolved cases were removed. A rough guideline for taxonomy  
292 assignment using percent similarity was used, where a hit with 98% similarity was used for  
293 species, 95% for genus, 90% for family and 85% for order levels. UpSetR (Conway, Lex, &

294 Gehlenborg, 2017; Lex et al., 2014) was used to visualise the number of shared mOTUs /  
295 families between each metabarcoding sampling method across all sites.

296

297 The number of SASS level family taxa detected by each DNA metabarcoding sampling  
298 method was then compared to morphology. Within the SASS picked samples singletons were  
299 artificially removed from the comparison as they were used for voucher sequencing (i.e. not  
300 available for metabarcoding in the SASS picked sample). The percentage of taxon overlap (at  
301 SASS level) of DNA methods with morphology was then calculated using R (version 3.5.3; R  
302 Core Team, 2019).

303

### 304 **Water Quality Assessment**

305 For each site, the ecoregion classification was determined based on Kleynhans et al. (2005),  
306 and the total Taxon Score and Average Score Per Taxon (ASPT) values calculated for each  
307 method (morphology, SASS picked, SASS leftover, Comprehensive and eDNA) and plotted  
308 against the biological band for that region. The SASS picked and SASS leftover taxon lists  
309 for each sample were also combined and deduplicated to simulate a full SASS sample being  
310 processed as a single unit.

311

312 Although SASS does not rely on measures of abundance, this is recorded and can be used for  
313 other indices, such as the Macroinvertebrate Response Assessment Index (MIRAI, Thirion,  
314 2007). At the family (or higher taxon) level, the relationship between SASS-level  
315 morphologically detected abundance and relative read abundance was explored using linear  
316 regression.

317

### 318 **Historical species records**

319 The taxa previously recorded for each river / sampling area were extracted from the database  
320 of the Albany Museum, Makhanda (previously known as Grahamstown), which houses the  
321 largest freshwater invertebrate collection in Africa, including from the sites sampled in this  
322 study, and compared to the target mOTUs recovered by molecular methods. Only records  
323 identified at the genus or species level were used for comparison. Where available, data on  
324 the number of described species for the broader region (Eastern Cape / South Africa /  
325 southern Africa as applicable) was added to the analysis.

326

## 327 **Results**

### 328 **Sequencing statistics**

329 The MiSeq run yielded 16 million reads from the 68 tagged samples (raw data available from  
330 <https://doi.org/10.5281/zenodo.3462633>). After library demultiplexing, an average of  
331 221,630 (SD = 69,340) read pairs were retained. After bioinformatic processing, a total of  
332 17,660 mOTUs were detected which was then reduced to 5,117 mOTUs that were present in  
333 more than one technical replicate. Taxonomy was assigned using BOLD and NCBI, the  
334 mOTU table was filtered according to freshwater macroinvertebrate fauna listed in the SASS  
335 protocol resulting in a total of 404 “target” mOTUs being found across all samples. A  
336 regression comparing volume of water and number of target mOTUs found per eDNA  
337 Sterivex filter (N = 21) found a slightly negative but significant correlation, with a low  
338 adjusted R<sup>2</sup> value (adj. R<sup>2</sup> = 0.1854, slope = -0.00345, P = 0.02936).

339

340 The proportion of reads lost from each processing step to the 404 target taxa found across  
341 samples and sites are shown in Fig. 2. SASS picked samples represented the “cleanest”  
342 samples, with the lowest proportions of reads discarded (mostly under 20% discarded),  
343 Comprehensive and SASS leftovers showed similar results (ca. 40 - 50% discarded), while  
344 over 90% of reads were discarded for the eDNA samples (Fig. 2).

345

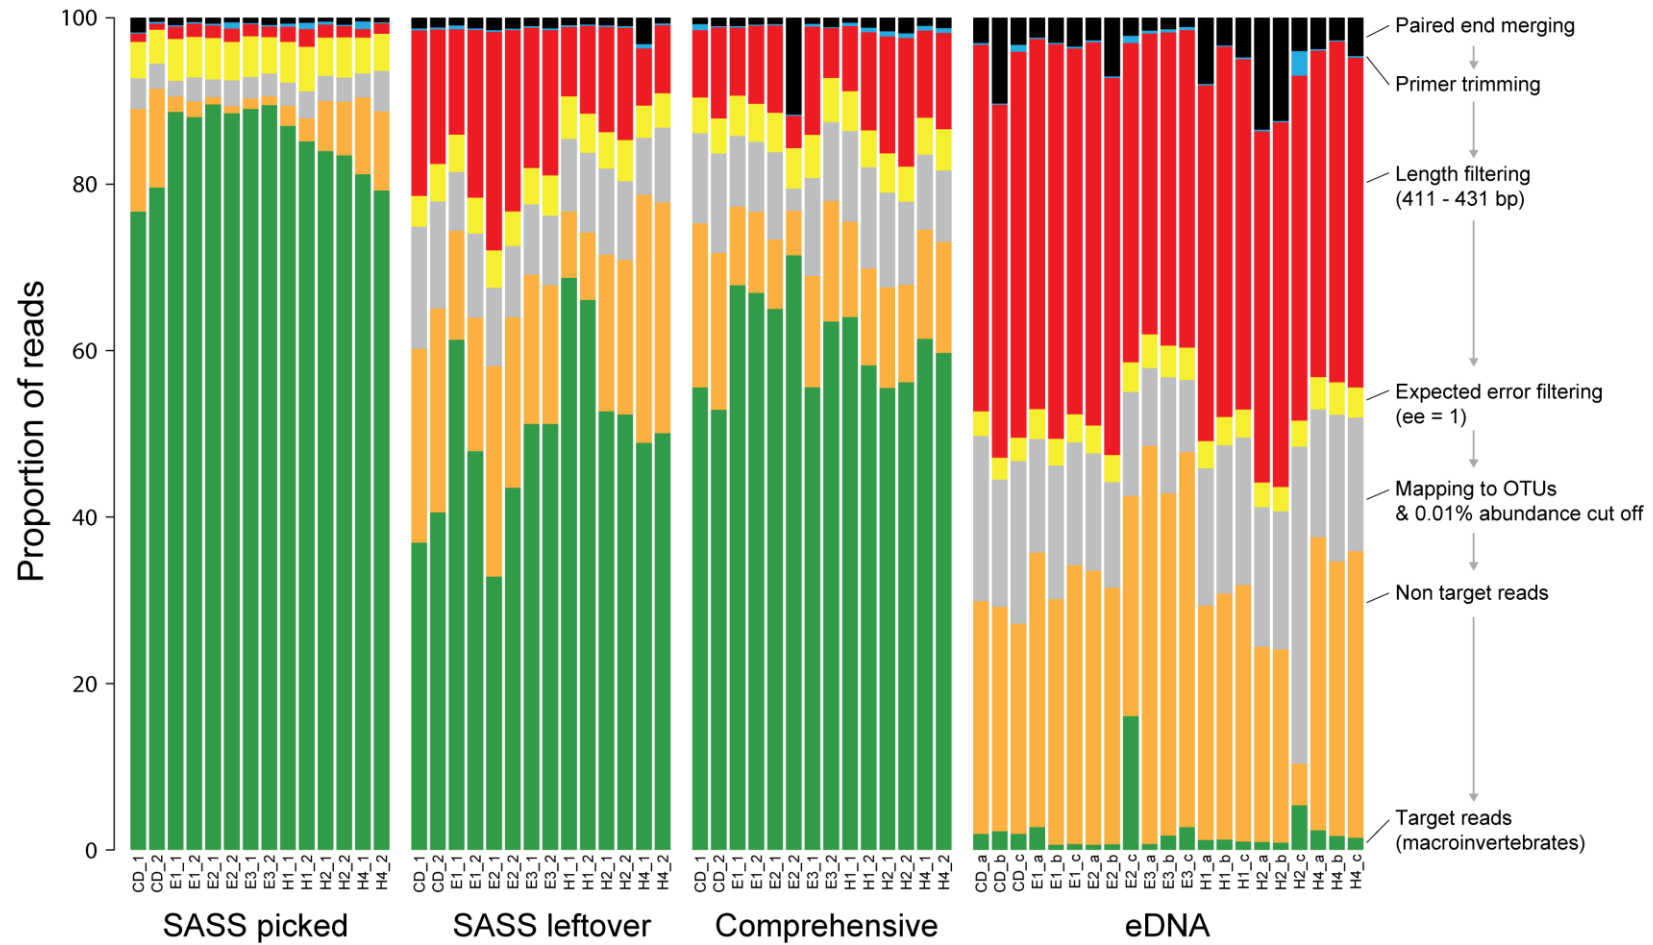

346

347 **Fig. 2.** Proportion of reads lost during each processing step, an overview of sequences discarded from raw data, bioinformatics processing and  
348 non-target hits (e.g. bacteria) compared to the target macroinvertebrate taxa (green).

### 349 **Overlap between DNA methods**

350 When considering the number of mOTUs shared between methods across all sites, only 57 of  
351 the 5,117 mOTUs (0.01%) found were shared between all four methods (Fig. 3a). As  
352 expected, SASS picked returned mostly arthropods (237 mOTUs), 76% of which were also  
353 present in the SASS leftover sample and 84% of SASS picked mOTUs were shared with the  
354 Comprehensive sample (Fig. 3a). The eDNA samples showed the least overlap with other  
355 methods, but returned the highest number of mOTUs (3,446) most of which were unique  
356 (84%). The Comprehensive (1,249 mOTUs) and SASS leftovers (1,780 mOTUs) shared 841  
357 mOTUs (Fig. 3a).

358

359 For targeted SASS mOTUs, only 42 of 404 mOTUs (0.1%) were shared between all four  
360 methods (Fig. 3b). SASS leftover (227 mOTUs) and Comprehensive samples (331 mOTUs)  
361 overlapped with SASS picked by 78% and 93% respectively, and shared 196 mOTUs. The  
362 eDNA samples recovered 80 target mOTUs, 19% of which were unique and not found by any  
363 other method. The Comprehensive sample had the highest number of unique mOTUs (103)  
364 corresponding to 26% of all target mOTUs found (Fig. 3b).

365

366 At the SASS mixed taxon (mostly family) level 19 out of 57 taxa were shared between all  
367 four methods (Fig. 3c). The three kick-net based methods (SASS picked, SASS leftover and  
368 Comprehensive) shared a further 14 taxa. The eDNA samples shared another 2 taxa with  
369 SASS leftovers, and each method, except SASS picked, found 2-3 unique taxa (Fig. 3c).

370

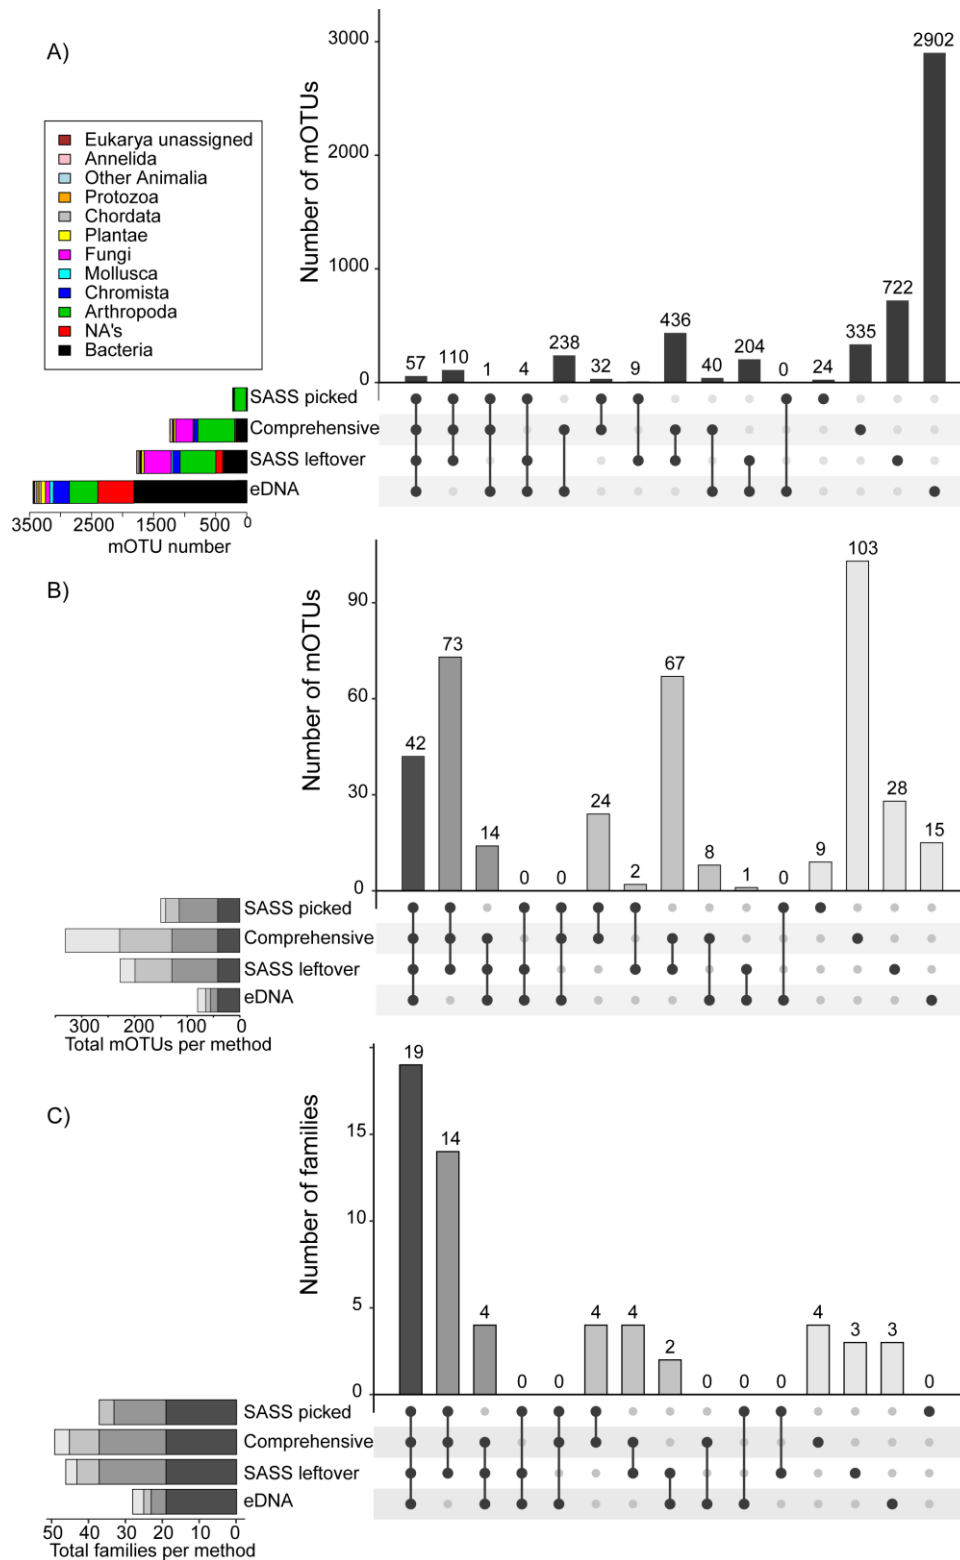

371

372 **Fig. 3.** UpSet bar plot showing shared mOTUs between each sampling method across all

373 sites. (A) For the 5117 subset mOTUs and (B) of the 404 mOTUs representing target

374 freshwater invertebrates listed in the SASS protocol. C). UPset plot showing overlap of

375 family level taxa between DNA based methods.

## 376 **Taxonomic identification at family level**

377 At the SASS mixed taxon level, morphological based identification resulted in 51 taxa (Table  
378 S1) with an average of  $21.86 \pm 2.97$  taxa at each site. SASS picked was most similar to  
379 morphology (mean =  $20.86 \pm 3.63$ ), as expected given the morphotaxa came from these  
380 samples. Four SASS taxa were not recovered by DNA metabarcoding across the SASS  
381 picked samples: Ancyliidae (Gastropoda) which was missing from 2/7 samples, Hydroptilidae  
382 (Trichoptera) missing from 2/7 samples, Gyrinidae and Chironomidae each missing from one  
383 sample. Seven families that were not recorded by morphology in some SASS picked samples  
384 were recovered by DNA metabarcoding: Caenidae, Notonemouridae, Philopotamidae,  
385 Pisuliidae, Teloganodidae and Tipulidae, potentially a result of sequencing gut contents of  
386 other invertebrates.

387

388 Comprehensive sample DNA metabarcoding generally found more target families than all the  
389 other methods (mean =  $25.71 \pm 4.75$ ), and recovered nearly 4 more families than morphology  
390 (Fig. 4a) on average across sites. All other methods found fewer target families than  
391 morphology on average. SASS leftover recovered between 14 - 26 target families (mean =  
392  $19.14 \pm 3.72$ ) while taxon recovery from the eDNA samples was consistently lower than  
393 other methods, between 5 - 16 target families (mean =  $10.29 \pm 3.82$ ) (Fig. 4a).

394

395 Despite the Comprehensive method finding more family taxa than had been observed using  
396 morphology, the method did not recover all the same taxa with a 68 - 92 % overlap with  
397 morphologically identified taxa (failing to detect between 2 - 8 taxa, mean =  $3.57 \pm 2.07$ )  
398 (Fig. 4b). SASS picked samples showed a 74 - 100 % overlap with morphology, failing to  
399 detect between 0 - 5 taxa (mean =  $2.29 \pm 1.80$ ) across all samples. SASS leftover failed to  
400 detect an average of 34% (6 - 11 taxa, mean =  $7.43 \pm 1.81$ ), while eDNA failed to detect an  
401 average of 70% (10 - 22 taxa, mean =  $15.57 \pm 5.32$ ) of morphologically identified taxa,  
402 respectively (Fig. 4b).

403



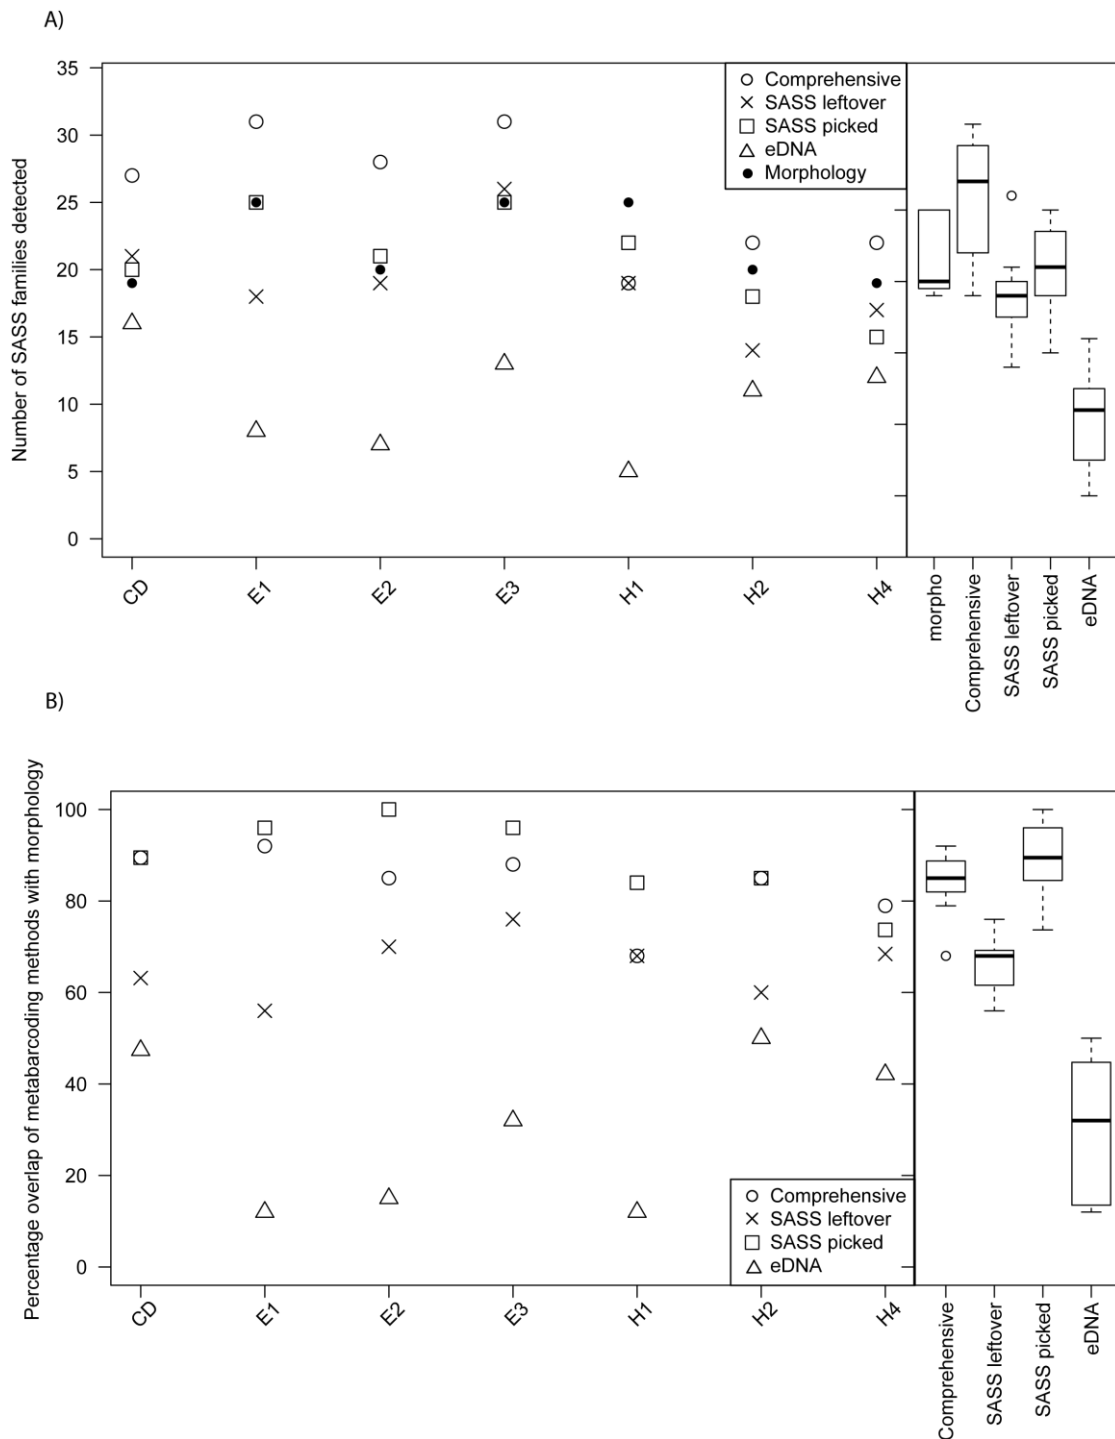

404

405 **Fig. 4** (A) number of SASS mixed taxon level taxa detected by morphological SASS and  
 406 DNA-based methods (eDNA, SASS picked, SASS debris and Comprehensive debris) across  
 407 sites. (B) percentage overlap of the taxa detected by DNA-based methods (eDNA, SASS  
 408 picked, SASS debris and Comprehensive debris) with morphology.

409

410 Water quality assessment metrics calculated for SASS-level morphology and DNA  
411 metabarcoding data were generally similar across methods when interpreted using Ecoregion  
412 Level 1 classified biological bands (Dallas, 2007), except for some eDNA samples (Fig. 5a-  
413 c). The total taxon scores varied considerably across sites sampled, even based on  
414 morphology, however ASPT was less variable and is recommended as the common SASS  
415 index of choice (Dickens & Graham, 2002), this is particularly evident in the Craigdoone site  
416 (Fig. 5a), where the total taxon scores differed by over 75 units while ASPT remained very  
417 similar between methods.  
418

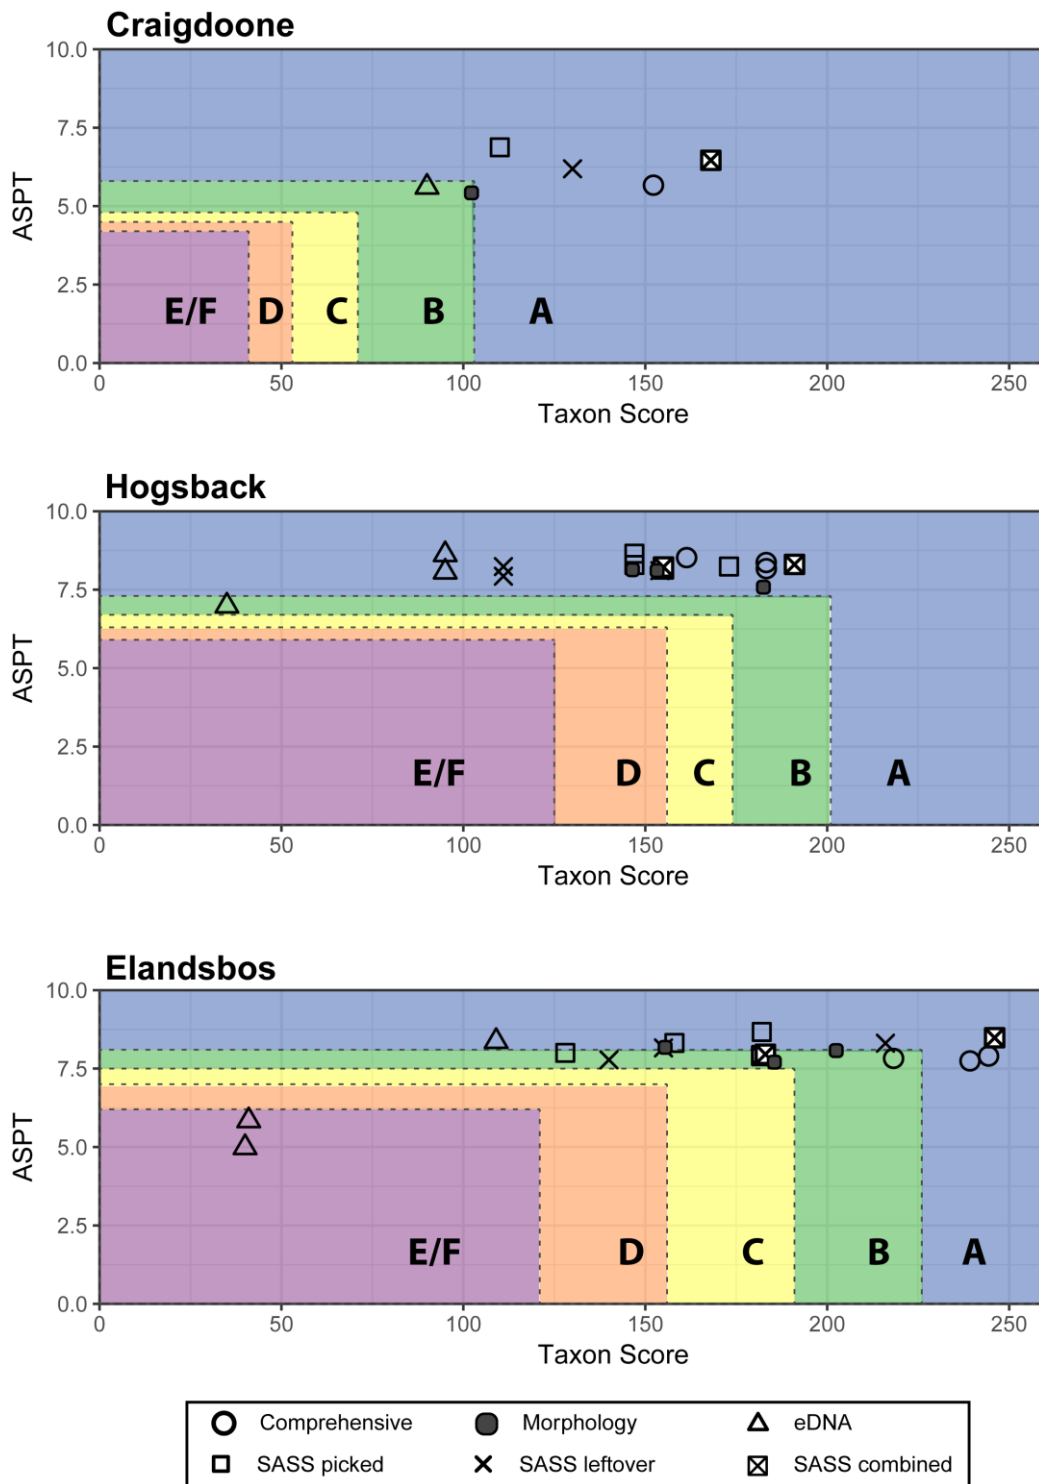

419

420 **Fig. 5.** Plot of Taxon Score and ASPT scores, showing results for each site according to

421 method. Biological bands are shown for each region, calculated through the intersection of

422 total score and ASPT: A = natural (blue), B = good (green), C = fair (yellow), D = poor (red)

423 and E/F = seriously modified (purple).

424

425 The relative proportion of reads assigned to each family was positively correlated with  
426 abundance when all sites were combined into a single regression (Fig. 6) with a significant  
427 but moderate adjusted  $R^2$  value ( $R^2 = 0.557$ ,  $p < 0.0001$ ).  
428

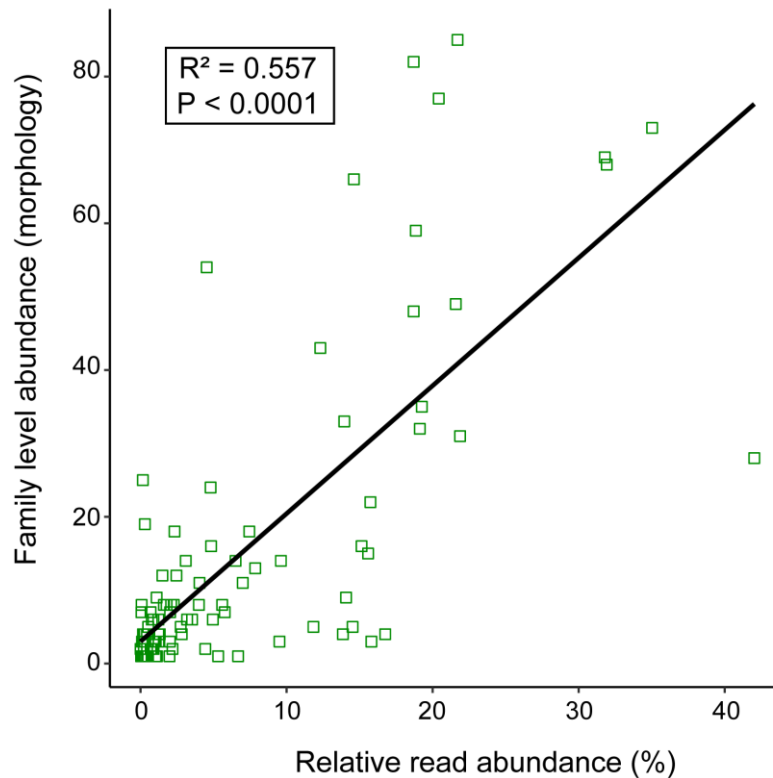

429  
430 **Fig. 6.** Relative abundance of sequences from SASS picked samples plotted against number  
431 of specimens morphologically identified at SASS-level for all sites sampled.

432

### 433 **Taxonomic identification at morphotaxon level**

434 A total of 319 morphotaxa were picked from the SASS samples, identified to mixed taxon  
435 level and sanger sequenced to be used as vouchers. Of these, duplicate species as identified  
436 by COI sequences and non-target taxa (terrestrial invertebrates) were removed, leaving 254  
437 unique freshwater macroinvertebrate morphotaxa. Voucher sequences were uploaded to  
438 BOLD before taxonomy assignment on the metabarcode data commenced. Morphotaxa were  
439 identified mostly to family and genus level using the Guide to the Freshwater Invertebrates of  
440 Southern Africa Series (Water Research Commission, specific references in Table 1), while  
441 NCBI and BOLD were used to confirm identifications and help infer some species names.

442

443 When the number of taxa are compared across methods for the seven sites (Fig. 7), the SASS-  
444 level taxa for both morphology and DNA-based methods are similar. Species level  
445 assignment was poor as the reference library for South African macroinvertebrate fauna is  
446 limited, and only 42 out of 254 morphotaxa and 57 out of 404 mOTUs could be assigned to  
447 species. If the mOTU levels are considered without assignment, then the spread of mOTU-  
448 taxa is more apparent and mean mOTU numbers found with each method are considerably  
449 more variable (Fig. 7), highlighting the increased information obtainable at a higher taxon  
450 resolution.

451

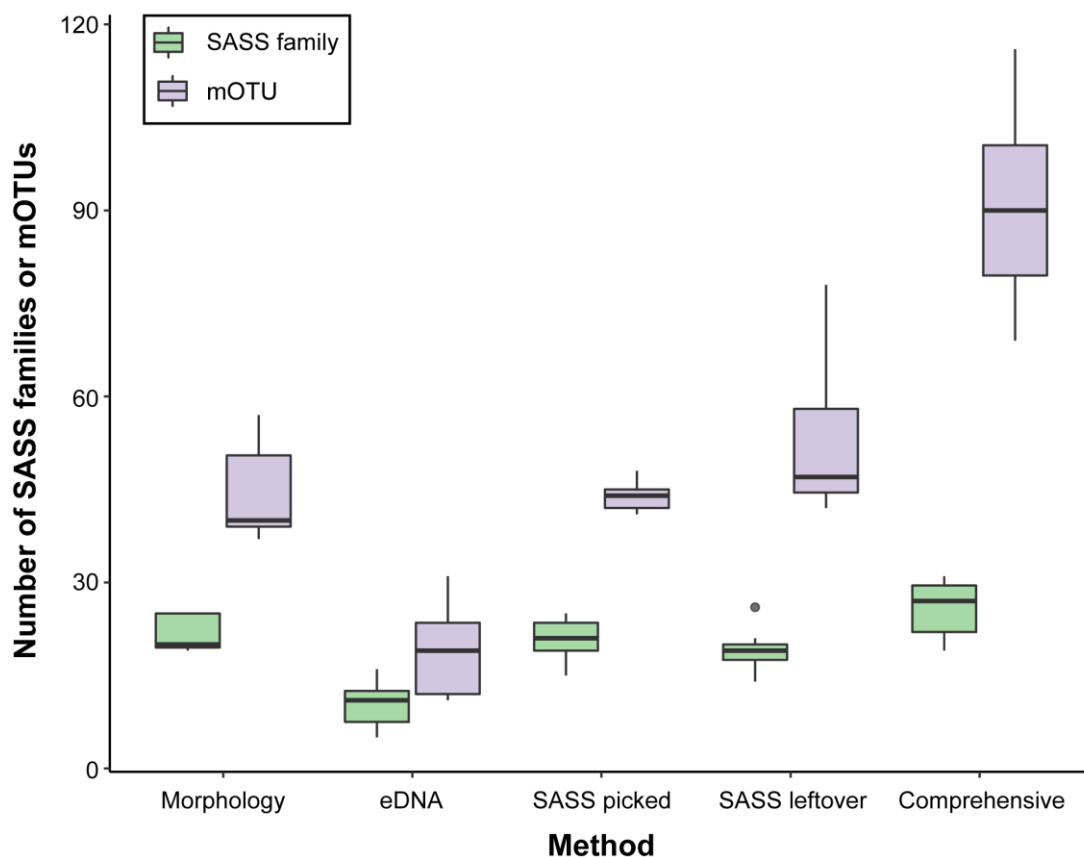

452

453 **Fig. 7.** Box and whisker plot showing the mean and interquartile range for SASS-level

454 (green) and OTU-level (purple) taxon numbers for each method over the seven sites.

455

456

457 **mOTU recovery compared to historical records (Table 1, Fig. S3)**

458 Comparing mOTUs in these three rivers against historical records of species from the region  
459 highlighted several groups with potentially high levels of cryptic diversity (Table 1). This  
460 was especially apparent within the true flies (Diptera) where molecular methods found a total  
461 of 101 mOTUs for Chironomidae (Comprehensive = 88; SASS picked = 15; SASS leftover =  
462 65; eDNA = 21) whereas current records from these rivers include two species, with an  
463 estimated 30 species from the wider Eastern Cape province. Within the Simuliidae (Diptera)  
464 molecular methods found 34 mOTUs (Comprehensive = 31; SASS picked = 23; SASS  
465 leftover = 29; eDNA = 11) whereas current records from these rivers include 12 species, with  
466 23 species known from the wider Eastern Cape province. Within the mayflies  
467 (Ephemeroptera) two families showed high levels of cryptic diversity; in the Baetidae  
468 (Ephemeroptera) molecular methods found 24 mOTUs (Comprehensive = 24; SASS picked =  
469 23; SASS leftover = 19; eDNA = 8) whereas current records from these rivers include 17  
470 species, with 37 species known from the entire region of southern Africa. Whereas within the  
471 Leptophlebiidae (Ephemeroptera) molecular methods found 9 mOTUs (Comprehensive = 8;  
472 SASS picked = 9; SASS leftover = 8; eDNA = 4) whereas current records from these rivers  
473 include five species, with 20 species known from the entire region of southern Africa. Within  
474 the stoneflies (Plecoptera) the Notonemouridae exhibited high levels of cryptic diversity with  
475 the molecular methods finding 13 mOTUs (Comprehensive = 13; SASS picked = 7; SASS  
476 leftover = 7; eDNA = 1) whereas current records from these rivers include 2 species, with 14  
477 species known from South Africa.

478

479 Within the dragonflies and damselflies (Odonata) the family Platycnemididae exhibited very  
480 high levels of cryptic diversity with the molecular methods finding 10 mOTUs  
481 (Comprehensive = 5; SASS picked = 6; SASS leftover = 2; eDNA = 0) whereas current  
482 records from these rivers include one species, with only two species known from the wider  
483 Eastern Cape province. Within the Oligochaeta which are typically not identified further in  
484 the SASS protocol, molecular methods found 42 mOTUs (Comprehensive = 34; SASS  
485 picked = 8; SASS leftover = 28; eDNA = 2) whereas current records from these rivers  
486 include one species, with 29 species known from the wider Eastern Cape province. Within  
487 the Potamonautidae (Crustacea) molecular methods found 23 mOTUs (Comprehensive = 22;  
488 SASS picked = 4; SASS leftover = 3; eDNA = 2) whereas current records from these rivers  
489 include 2 species, with 14 species known from South Africa.

490

491 **Table 1.** Number of mOTUs recovered for each family with DNA-based methods, compared to  
 492 Albany Museum historical specimen records of species found at the rivers sampled in this study.  
 493 Regional records for families with number of mOTUs >5 and for those with regional species  
 494 information readily available. Regional information available include Eastern Cape (EC) sometimes  
 495 with Western Cape (WC), South Africa (SA) and southern Africa.

| <b>Taxon</b>     | <b># mOTUs</b> | <b># Historical records</b> | <b>#species known from river sites</b> | <b>Regional</b>               |
|------------------|----------------|-----------------------------|----------------------------------------|-------------------------------|
| Chironomidae     | 101            | 2                           | 30                                     | EC <sup>1</sup>               |
| Oligochaeta      | 42             | 1                           | 29                                     | EC <sup>2</sup>               |
| Simuliidae       | 34             | 12                          | 23                                     | EC <sup>3</sup>               |
| Baetidae         | 24             | 17                          | 37                                     | southern Africa <sup>4</sup>  |
| Potamonautidae   | 23             | 2                           | 14                                     | SA <sup>5</sup>               |
| Notonemouridae   | 13             | 4                           | 8                                      | EC <sup>6</sup>               |
| Hydracarina      | 10             | 8                           | 23                                     | EC <sup>7</sup>               |
| Platycnemididae  | 10             | 1                           | 2                                      | EC <sup>8</sup>               |
| Coenagrionidae   | 9              | 10                          | 18                                     | EC <sup>8</sup>               |
| Gyrinidae        | 9              | 4                           | 24                                     | EC <sup>9</sup>               |
| Leptophlebiidae  | 9              | 5                           | 20                                     | southern Africa <sup>4</sup>  |
| Leptoceridae     | 8              | 6                           | 36                                     | WC/EC <sup>10</sup>           |
| Ceratopogonidae  | 5              | 2                           | 142                                    | southern Africa <sup>11</sup> |
| Dytiscidae       | 5              | 3                           | 27                                     | EC <sup>12</sup>              |
| Elmidae          | 5              | -                           | 5                                      | EC <sup>13</sup>              |
| Scirtidae        | 5              | 1                           | ?                                      | unknown <sup>14</sup>         |
| Coelenterata     | 4              | -                           |                                        |                               |
| Corydalidae      | 4              | 3                           |                                        |                               |
| Gomphidae        | 4              | 5                           | 5                                      | EC <sup>8</sup>               |
| Hydropsychidae   | 4              | 5                           |                                        |                               |
| Notonectidae     | 4              | 1                           |                                        |                               |
| Sphaeriidae      | 4              | 1                           |                                        |                               |
| Teloganodidae    | 4              | 2                           | 2                                      | EC <sup>4</sup>               |
| Tipulidae        | 4              | 2                           |                                        |                               |
| Amphipoda        | 3              | -                           |                                        |                               |
| Athericidae      | 3              | 1                           |                                        |                               |
| Corixidae        | 3              | 2                           |                                        |                               |
| Naucoridae       | 3              | 1                           |                                        |                               |
| Pisuliidae       | 3              | 1                           |                                        |                               |
| Porifera         | 3              | -                           |                                        |                               |
| Sericostomatidae | 3              | 2                           |                                        |                               |
| Turbellaria      | 3              | -                           |                                        |                               |
| Caenidae         | 2              | 2                           |                                        |                               |
| Corduliidae      | 2              | 1                           | 1                                      | WC <sup>8</sup>               |
| Culicidae        | 2              | -                           |                                        |                               |
| Lepidoptera      | 2              | -                           |                                        |                               |
| Lepidostomatidae | 2              | 2                           |                                        |                               |
| Philopotamidae   | 2              | 2                           |                                        |                               |
| Synlestidae      | 2              | 5                           | 3                                      | EC <sup>8</sup>               |

|                   |   |   |    |                  |
|-------------------|---|---|----|------------------|
| Trematoda         | 2 | - |    |                  |
| Aeshnidae         | 1 | 4 | 6  | EC <sup>8</sup>  |
| Ancyliidae        | 1 | 2 |    |                  |
| Barbarochthonidae | 1 | 1 |    |                  |
| Blephariceridae   | 1 | 1 | 2  | EC <sup>15</sup> |
| Bulinidae         | 1 | - |    |                  |
| Chlorocyphidae    | 1 | - | 2  | EC <sup>8</sup>  |
| Dixidae           | 1 | 1 | 3  | SA <sup>15</sup> |
| Ecnomidae         | 1 | 2 |    |                  |
| Empididae         | 1 | - |    |                  |
| Gerridae          | 1 | 2 |    |                  |
| Glossosomatidae   | 1 | 1 |    |                  |
| Heptageniidae     | 1 | 1 |    |                  |
| Hydrophilidae     | 1 | 3 |    |                  |
| Hydroptilidae     | 1 | 4 |    |                  |
| Libellulidae      | 1 | 8 | 10 | EC <sup>8</sup>  |
| Pleidae           | 1 | 1 |    |                  |
| Syrphidae         | 1 | - |    |                  |
| Tabanidae         | 1 | 1 |    |                  |
| Tricorythidae     | 1 | 1 |    |                  |
| Veliidae          | 1 | 1 |    |                  |

496 Citations: <sup>1</sup>Harrison 2004, <sup>2</sup>van Hoven and Day 2002, <sup>3</sup>de Moor 2002, <sup>4</sup>Barber-James and Lugo-Ortiz  
 497 2003, <sup>5</sup>Cumberlidge and Daniels 2008, <sup>6</sup>Stevens and Picker 2003, <sup>7</sup>Jansen van Rensburg and Day  
 498 2002, <sup>8</sup>Samways and Wilmot 2003, <sup>9</sup>Stals 2008, <sup>10</sup>de Moor and Scott 2003, <sup>11</sup>de Meillon and Wirth  
 499 2002, <sup>12</sup>Biström 2008, <sup>13</sup>Nelson 2008, <sup>14</sup>Endrödy-Younga & Stals 2008, <sup>15</sup>Harrison, Prins & Day 2002

500

## 501 Discussion

### 502 DNA methods comparisons

503 In this study, we compared four DNA-based methods for recovering biodiversity at mixed  
 504 higher taxon (typically family level) and the mOTU level in the context of water quality  
 505 biomonitoring and rapid biodiversity assessment. The methods included a standardised SASS  
 506 sample split into the picked individuals (SASS picked) and the leftover debris (SASS  
 507 leftover), a Comprehensive sample searching for a longer time period with a finer mesh size,  
 508 and an eDNA sample of filtered water from each site. Although the SASS picked samples  
 509 contained mostly target sequences as a result from the sorting and picking process (Fig. 2),  
 510 this method also recovered a lower diversity at the mOTU level than the SASS leftover debris  
 511 which was part of the same sample (Fig. 3 and 7). When comparing morphotaxa with the  
 512 SASS picked mOTUs (essentially the same sample) some of the discrepancies observed may  
 513 be due to primer bias, rare taxa and the amplification of gut-contents. Other studies have  
 514 highlighted issues with sorting and picking samples as it is time-consuming and introduces



515 errors associated with missed taxa (Haase et al., 2006, 2010) and is especially difficult to  
516 manage for large samples (Bongard, 2011).

517

518 The Comprehensive and SASS leftover samples showed similar proportions of non-target  
519 reads, and similar compositions of target and non-target taxa detected, however sample  
520 inhibition, due to the substantial debris in both of these sample types, was not apparent,  
521 although this was not experimentally validated in our study.

522

523 The Comprehensive method found the highest number of target taxa and the highest number  
524 of unique target taxa, suggesting that a longer sampling time with a smaller size mesh net,  
525 followed by whole sample homogenisation captures more of the local macroinvertebrate  
526 diversity than either the standardised SASS sampling protocol, or the eDNA sampling  
527 method tested in our study. This increase in mOTU diversity recovered in the Comprehensive  
528 sample is potentially due to the inclusion of taxa that would morphologically be considered as  
529 “out of season” due to their lifestage (e.g. eggs / small larvae) and otherwise undetectable.  
530 Thus, the Comprehensive sampling approach has the potential to reduce the number of  
531 sampling visits to a site if unseasonal taxa can also be detected, however this needs further  
532 testing.

533

534 The high diversity recovered from both the SASS leftovers and the Comprehensive samples  
535 are promising as the processing time is dramatically reduced if the invertebrates do not need  
536 to be removed for identification and more freshwater macroinvertebrate studies are focusing  
537 on unsorted whole-sample homogenisation (Andújar et al., 2018; Dowle et al., 2016;  
538 Gardham et al., 2014; Hajibabaei et al., 2011; Majaneva et al., 2018).

539

540 Our eDNA sampling method found between 2 to 10 times more mOTUs than any other  
541 method, however a remarkable proportion of reads were discarded during bioinformatics  
542 processing, as many reads were short or non-target reads (e.g. bacteria, Chromista, Plantae  
543 and some Chordata). Thus, the number of target taxa detected with eDNA was lower than for  
544 all other methods. These non-target reads are likely due to the highly degenerate primers  
545 used, which may be unsuitable for eDNA based studies of freshwater macroinvertebrates  
546 (Macher et al., 2018; Smith et al., 2012). Although the eDNA samples recovered fewer taxa  
547 than the kick-samples, eDNA found more mOTUs for the Gastropoda, Amphipoda, Porifera

548 (sponges), Coelenterata and Platyhelminthes than any other method (Fig. S3) suggesting they  
549 may complement traditional kick-sampling methods for these groups.

550

551 While these results, supported by a number of other studies, show that eDNA as currently  
552 sampled and analysed is an unlikely alternative to sampling whole organisms for detection of  
553 whole macroinvertebrate communities in the near term (Barnes & Turner, 2016; Blackman et  
554 al., 2019; Hajibabaei et al., 2019; Macher et al., 2018), the field is advancing at a rapid rate  
555 (Blackman et al., 2019; Deiner et al., 2017; Deiner, Mächler, et al., 2016; Li et al., 2018;  
556 Mächler et al., 2019; Majaneva et al., 2018). Our stringent approach using sequencing  
557 replicates should substantially reduce OTUs remaining which are a result of sequencing error  
558 but is also likely to have resulted in target taxa being lost from the eDNA samples at this  
559 sequencing depth. Nonetheless, in the context of SASS water quality biomonitoring in South  
560 Africa our results highlight that eDNA has the potential to be incorporated as it found similar  
561 water quality scores to the morphological-based methods in 5 out of 7 sites, however  
562 additional research is required to explore macroinvertebrate eDNA metabarcoding across the  
563 water quality bands used in South Africa and with more targeted primers. For fish, Pochardt  
564 et al (Pochardt, Allen, Hart, Miller, & Yu, 2019) used eDNA to estimate populations over  
565 several years, providing an example of advanced developments in eDNA applications to  
566 assist with management questions, assessing both presence and abundance of the target  
567 organisms. Our results show the potential use of eDNA in assisting with ecosystem  
568 management by offering a unique method of biomonitoring, and once established, can  
569 provide a much safer and quicker way of monitoring rivers than the current practice which  
570 involves physically collecting invertebrate samples from rivers which may harbour dangerous  
571 animals such as crocodiles.

572

### 573 **Comparison of methods at family level and water quality metrics**

574 For most biodiverse countries, DNA reference libraries are still a major limiting factor (e.g.  
575 Venter & Bezuidenhout, 2016), however most taxa can at least be assigned confidently to  
576 family level or below, using current data on BOLD, as was the case for the target taxa in this  
577 study suggesting that reference libraries do not hinder the incorporation of DNA  
578 metabarcoding into the current SASS protocol.

579

580 The results show that while some DNA-based metabarcoding methods detect more diversity  
581 than morphology, even at family level, they do not always find the same taxa, as has been  
582 reported in other studies (Carew et al., 2013; Clarke, Beard, Swadling, & Deagle, 2017;  
583 Elbrecht, Vamos, Meissner, et al., 2017; Gibson et al., 2015; Lejzerowicz et al., 2015;  
584 Zimmermann, Glöckner, Jahn, Enke, & Gemeinholzer, 2015). The Comprehensive and  
585 SASS-picked samples detected more of the morphologically detected taxa than the SASS  
586 leftover samples, which is to be expected as specimens were removed to form the leftover  
587 samples. All three kick-net based invertebrate sampling methods detected more target taxa  
588 than the eDNA samples. However, despite these differences in taxon recovery between  
589 methods at the SASS-level, results for water quality assessment metrics were similar across  
590 morphology-based and DNA-based methods. All rivers sampled are considered to be in a  
591 good (biological band “B” category) to natural state (biological band “A” category), which  
592 was reflected in both the morphology-based and DNA-based results. While these results  
593 suggest that metabarcoding (with the exception of eDNA in this case) can produce usable  
594 data for current assessment techniques, the DNA methods tested here are able to detect more  
595 families than are be detected with morphology, thus their inclusion into the current  
596 morphology-based SASS indices could lead to inflated results. While these results are very  
597 promising for DNA based water quality assessment in South Africa it is clear that further  
598 research at sites which represent the full spectrum of water quality bands are required to  
599 facilitate intercalibration of these new DNA methods.

600

601 The large variation in numbers and types of taxa found across methods indicates that the  
602 family (SASS) level taxon identification is potentially too coarse to make sound assessments  
603 on ecological changes in water quality. Our samples differed considerably in terms of taxon  
604 scores and numbers, yet when compared at the SASS-level of biological bands, these  
605 differences became minimal. A number of studies have warned that family-level  
606 identification, being a compromise between accuracy and the level of taxonomic expertise  
607 required, is not precise enough to assess water quality changes, primarily due to the different  
608 habitat requirements and pollution tolerances found between species within the same family  
609 (Barber-James & Pereira-da-Conceicao, 2016; de Moor, 2002a; Odume, Muller, Arimoro, &  
610 Palmer, 2012; Odume, Palmer, Arimoro, & Mensah, 2015). The current lack of data on the  
611 habitat requirements and pollution tolerances of some groups can prove problematic for  
612 monitoring, especially in biodiverse but water-stressed areas such as South Africa, however a

613 DNA based approach may rapidly provide these data over large taxonomic and geographic  
614 scales when combined with relevant information on the sites sampled and the inclusion of  
615 reference sites.

616

617 Accurate estimation of taxon abundance is one of the current issues facing metabarcoding  
618 (Dowle et al., 2016; Elbrecht & Leese, 2015; Elbrecht, Vamos, Meissner, et al., 2017; Piñol,  
619 San Andrés, Clare, Mir, & Symondson, 2014), and is hindering practical application for  
620 biomonitoring in countries where water quality assessment metrics are required to include  
621 abundance measures. Although abundance is recorded and used for other indices in South  
622 Africa, it is not used directly for the SASS biomonitoring protocol, and when coupled with  
623 the use of family level of identification, would simplify the intercalibration of a DNA  
624 metabarcoding method for water quality assessment. The relationship between abundance at  
625 the SASS (mixed taxon) level and relative abundance of sequencing reads found a significant  
626 positive correlation for combined samples (Fig. 6) with a reasonable adjusted  $R^2$  value. Other  
627 studies have also shown that despite promising significant linear relationships, abundance is  
628 not successfully estimated mainly due to poor fit and large differences in magnitude of scatter  
629 (e.g. Carew et al., 2013; Clarke et al., 2017; Dowle et al., 2016; Elbrecht, Vamos, Meissner,  
630 et al., 2017; Leray & Knowlton, 2017), however additional samples are needed to investigate  
631 this relationship and the potential to use sequence reads to estimate abundance in the broad  
632 categories currently used by SASS.

633

634 Elbrecht et al (2017) provides a detailed overview of factors limiting the application of DNA  
635 metabarcoding for ecosystem assessment, and suggestions for potential solutions. Although  
636 protocols using DNA metabarcoding for monitoring still need to be further verified and  
637 validated, the technique is promising and provides detailed, reproducible and accurate results.  
638 Once methods and procedures are standardised, molecular methods are more likely to be  
639 integrated into official, routine monitoring programs (Blackman et al., 2019). The metrics  
640 used here are designed specifically for the SASS protocol and a mixed-taxon level  
641 morphological identification.

642

643

## 644 **Taxon recovery at higher resolution & mOTU vs historical records**

645 Our results indicate that DNA-based methods offer a higher taxonomic resolution compared  
646 to morphology-based identification, in agreement with previous studies (Baird & Sweeney,  
647 2011; Elbrecht, Vamos, Meissner, et al., 2017; Gibson et al., 2015; Stein et al., 2014;  
648 Sweeney, Battle, Jackson, & Dapkey, 2011). Taxonomically difficult groups, like Diptera  
649 (Chironomidae and Simuliidae in particular), mites and Oligochaeta are often not included at  
650 a high taxonomic resolution in biomonitoring protocols, however DNA metabarcoding is a  
651 powerful tool in this respect and is able to uncover remarkable mOTU diversity for these  
652 groups. Across the sites, 101 chironomid mOTUs were found using the Comprehensive  
653 method, while less than a third of that was picked from the SASS samples as morphospecies,  
654 and this diversity is usually recorded as a single family and potentially misrepresented by a  
655 relatively low taxon score. A similar pattern was seen within nearly all target groups in this  
656 study, in many cases a higher number of mOTUs were found than the number of species  
657 known from the province or even country, which is surprising given our limited sampling in  
658 only three rivers.

659

660 While access to morphological expertise has always limited the level to which taxa, and  
661 therefore patterns of biodiversity, can be identified, it is argued that the mOTU approach  
662 overestimates recognizable species (Clare, Chain, Littlefair, & Cristescu, 2016; Flynn,  
663 Brown, Chain, Macisaac, & Cristescu, 2015). This is particularly influenced by retention of  
664 rare sequences (singletons) however these are crucial for biodiversity studies (Clare et al.,  
665 2016) and despite differences in mOTU recovery rates due to parameter choice, the actual  
666 ecological conclusions are not strongly impacted if the error is equal among samples and  
667 treatments (Clare et al., 2016). The strength of a mOTU approach is the estimate of diversity  
668 ensuring comparability in the absence of described species (Clare et al., 2016) and not  
669 originally intended as a species concept (Floyd, Abebe, Papert, & Blaxter, 2002). Nowhere is  
670 this more applicable than in biodiversity hotspots, like southern Africa, where species  
671 diversity is poorly known. The mOTU approach using DNA-based methods for measuring  
672 diversity in areas where species level information is unknown, taxonomic experts and  
673 identification keys unavailable, is the most objective method with the added advantage of  
674 being more easily standardised. This is especially relevant in cases of cryptic diversity, as  
675 community composition data is grossly underestimated using morphological approaches

676 because the largest and most diverse groups (e.g. Chironomidae) are grouped together or  
677 omitted from analyses.

678

679 The advantage of developing a metabarcoding tool now, despite the limited reference  
680 libraries in South Africa, is that the data gathered can be “time stamped” and can be  
681 reanalysed as reference libraries are developed in parallel. The mOTU approach can aid in  
682 cryptic species detection (Delić, Trontelj, Rendoš, & Fišer, 2017) and rapidly increase the  
683 knowledge of species distribution ranges. There is also potential for future assessments using  
684 metabarcoding techniques to incorporate and standardise mOTUs (Blaxter et al., 2005) which  
685 have not been assigned to the species level, providing a relative diversity with an expected  
686 reference condition within an ecoregion. A standardised approach will allow for analysis of  
687 the effects of single or multiple stressors for even cryptic and undescribed species (Beermann  
688 et al., 2018; Macher et al., 2016). For those genera and species that can be identified using  
689 DNA, assessments can be further optimised by including and integrating species functional  
690 diversity, ecological preferences and the effects of ecosystem stressors, especially for  
691 indicator taxa (Macher et al., 2016).

692

693 Although there is still much uncertainty and concern with the conceptual and practical  
694 difficulties of translating mOTUs to species (Brown, Chain, Crease, Macisaac, & Cristescu,  
695 2015), the next step of standardising methods to produce measures of biodiversity that are  
696 comparable at the mOTU level will be the core of future biodiversity studies, especially  
697 where taxonomy is poorly known. It is unrealistic to wait for reference libraries to be built  
698 first. DNA metabarcoding approaches to characterise biodiversity have the potential to  
699 inspire and focus taxonomic works in hyperdiverse areas, without knowing species level  
700 information. Results can be calibrated and improved from existing assessment metrics and  
701 reference samples can be kept and assessed for quality control. These mOTU community-  
702 level assessments can be associated with ecological trait and preference data based on  
703 collection site data, which can be developed into a monitoring database over time. As DNA  
704 reference libraries are developed, these datasets will be available for reanalysis and method  
705 refinement for better monitoring practice. This detailed level of information can then be used  
706 for biomonitoring, biodiversity and ecological impact assessments, providing detailed  
707 evidence that can be used to inform managers, governments and policy.

708

## 709 **Conclusions**

710 DNA techniques, especially those using whole sample homogenisation, are not only able to  
711 recover the same water quality assessments as morphological SASS, but are able to identify  
712 taxa to a much higher resolution. Intensive search comprehensive sampling out-performed all  
713 other methods for the number of taxa detected, highlighting that the standardised SASS  
714 sampling method does miss relevant target taxa present in the environment, potentially due to  
715 the larger mesh size or limited sampling time. Comprehensive sampling with whole-sample  
716 homogenisation not only offers the potential to drastically reduce sample processing time, but  
717 also potentially collects out-of-season taxa.

718

719 While Comprehensive sample homogenisation is a method that has demonstrated promising  
720 results, other techniques using fixatives from bulk samples are being developed (Blackman et  
721 al., 2019; Carew, Coleman, & Hoffmann, 2018; Erdozain et al., 2019; Martins et al., 2019;  
722 Zizka, Leese, Peinert, & Geiger, 2019) and would be advantageous in that the sample remains  
723 intact for morphological identification if needed. The strength of eDNA methods for whole  
724 catchment assessments is promising (Blackman et al., 2019) and has the potential to benefit  
725 biomonitoring protocols by detecting different organisms and offering a safer alternative for  
726 assessing dangerous rivers.

727

728 This study shows that unsorted samples, including those with significant debris recover the  
729 same water quality scores as a morphology-based assessment and recovers much higher  
730 diversity scores than both picked and eDNA samples. This approach has significant  
731 advantages in that it provides both water quality assessment and species level data at the  
732 same time. Thereby making it possible to integrate DNA-based approaches into existing  
733 metrics quickly while providing much more information for the development of more refined  
734 metrics at the species or mOTU level with distributional data which, as reference libraries are  
735 developed, can be used for conservation and biodiversity management.

736

## 737 **Author contributions**

738 LP and BP designed the study. LP, HB-J and BP carried out sample collection. LP, BP, HB-J,  
739 AH and AB generated the data. LP, VE and AB analysed the data. LP, VE and BP wrote the  
740 original manuscript, all authors contributed to revisions and accepted the final version.

741

742 **Data Archiving Statement:**

743 Raw MiSeq data can be found here: <https://doi.org/10.5281/zenodo.3462633>

744

745 **Supporting Information**

746 Fig. S1: South African Scoring System (SASS) scoring sheet

747 Fig. S2. Map showing rivers and sites

748 Table S1. Morphologically identified taxa at SASS level (presence/absence)

749 Fig. S3. Detailed barplot showing the number of mOTUs per DNA-based method and

750 morphotaxa found for each SASS family

751

752 **Acknowledgements**

753 This research was funded by the Department of Business, Energy & Industrial Strategy  
754 Rutherford Fund. Florian Leese, Edith Vamos, Cristina Hartmann and Chris Hempel are  
755 thanked for providing the indexed BF2 / BR2 primers. Steve Russell (NHM) is thanked for  
756 barcoding the voucher specimens. The National Research Foundation (NRF), South Africa,  
757 incentive funding grant number 85286, and Rhodes University Research Council are also  
758 acknowledged for funding. Many thanks to Albany Museum staff who helped us in the field,  
759 Alex Holland, Musa Mlambo, Nonkazimulo Mdidimba, Ina Ferreira and Zezethu Mnqeta.  
760 Rhodes University students, Lauren James and Jacqui James. Juan Tedder (GroundTruth),  
761 Kirsty Venter and James Pereira da Conceicao. Special thanks to Dirk Roux and Nerina  
762 Kruger (SANPARKS) for assisting with permits and accommodation and Melanie de Morne  
763 (SANPARKS) for assisting in the field. Research material was collected under a once off  
764 sampling permit for the Tsitsikamma Section - Garden Route National Park issued on  
765 2017/11/10 by Nerina Kruger, permit number 0056\_AAA041-0053 and in the Eastern Cape  
766 under CRO 69/17CR and CRO 70/17CR.

767

768 **References**

769 Andújar, C., Arribas, P., Gray, C., Bruce, C., Woodward, G., Yu, D. W., & Vogler, A. P.

770 (2018). Metabarcoding of freshwater invertebrates to detect the effects of a pesticide  
771 spill. *Molecular Ecology*, 27(1), 146–166. <https://doi.org/doi:10.1111/mec.1441026>

772 Baird, D. J., & Hajibabaei, M. (2012). Biomonitoring 2.0: A new paradigm in ecosystem  
773 assessment made possible by next-generation DNA sequencing. *Molecular Ecology*,  
774 Vol. 21, pp. 2039–2044. <https://doi.org/10.1111/j.1365-294X.2012.05519.x>

775 Baird, D. J., & Sweeney, B. W. (2011). Applying DNA barcoding in benthology: the state of  
776 the science. *Journal of the North American Benthological Society*, 30(1), 122–124.



- 777 <https://doi.org/10.1899/10-154.1>
- 778 Barber-James, H. M., & Lugo-Ortiz, C. (2003). Chapter 2: Ephemeroptera. In I. de Moor, J.  
779 Day, & F. de Moor (Eds.), *Guides to the Freshwater Invertebrates of Southern Africa*  
780 *Volume 7: Insecta I: Ephemeroptera, Odonata & Plecoptera* (pp. 16–159). University of  
781 Cape Town: Water Research Commission Report No: TT 207/03.
- 782 Barber-James, H., & Pereira-da-Conceicao, L. (2016). Efficacy and deficiencies of rapid  
783 biomonitoring in biodiversity conservation: a case study in South Africa. *African*  
784 *Journal of Aquatic Science*, *41*(3), 337–343.  
785 <https://doi.org/10.2989/16085914.2016.1192019>
- 786 Barnes, M. A., & Turner, C. R. (2016). The ecology of environmental DNA and implications  
787 for conservation genetics. *Conservation Genetics*, *17*(1), 1–17.  
788 <https://doi.org/10.1007/s10592-015-0775-4>
- 789 Bates, B., Kundzewicz, Z. W., Wu, S., & Palutikof, J. P. Eds. (2008). *Climate Change and*  
790 *Water. Technical Paper of the Intergovernmental Panel on Climate Change.* (pp. 1-  
791 210). IPCC Secretariat, Geneva.
- 792 Beermann, A. J., Elbrecht, V., Karnatz, S., Ma, L., Matthaei, C. D., Piggott, J. J., & Leese, F.  
793 (2018). Multiple-stressor effects on stream macroinvertebrate communities: A  
794 mesocosm experiment manipulating salinity, fine sediment and flow velocity. *Science of*  
795 *the Total Environment*, *610–611*, 961–971.  
796 <https://doi.org/10.1016/j.scitotenv.2017.08.084>
- 797 Biström, O. (2008). Chapter 6: Dytiscidae. In R. Stals & I. de Moor (Eds.), *Guides to the*  
798 *Freshwater Invertebrates of Southern Africa. Volume 10: Coleoptera* (pp. 69–84). Water  
799 Research Commission.
- 800 Blackman, R. C., Constable, D., Hahn, C., Sheard, A. M., Durkota, J., Hänfling, B., &  
801 Handley, L. L. (2017). Detection of a new non-native freshwater species by DNA  
802 metabarcoding of environmental samples – first record of *Gammarus fossarum* in the  
803 UK. *Aquatic Invasions*, *12*(2), 177–189. <https://doi.org/10.3391/ai.2017.12.2.06>
- 804 Blackman, R., Mächler, E., Altermatt, F., Arnold, A., Beja, P., Boets, P., ... Deiner, K.  
805 (2019). Advancing the use of molecular methods for routine freshwater  
806 macroinvertebrate biomonitoring – the need for calibration experiments. *Metabarcoding*  
807 *and Metagenomics*, *3*, 49–57. <https://doi.org/10.3897/mbmg.3.34735>
- 808 Blaxter, M., Mann, J., Chapman, T., Thomas, F., Whitton, C., Floyd, R., & Abebe, E. (2005).  
809 Defining operational taxonomic units using DNA barcode data. *Philosophical*

- 810 *Transactions of the Royal Society B: Biological Sciences*, 360(1462), 1935–1943.  
811 <https://doi.org/10.1098/rstb.2005.1725>
- 812 Bongard, T. (2011). Detecting Invertebrate Species Change in Running Waters: An Approach  
813 Based on the Sufficient Sample Size Principle. *The Open Environmental & Biological*  
814 *Monitoring Journal*, 4(1), 72–82. <https://doi.org/10.2174/1875040001104010072>
- 815 Brown, E. A., Chain, F. J. J., Crease, T. J., Macisaac, H. J., & Cristescu, M. E. (2015).  
816 Divergence thresholds and divergent biodiversity estimates: Can metabarcoding reliably  
817 describe zooplankton communities? *Ecology and Evolution*, 5(11), 2234–2251.  
818 <https://doi.org/10.1002/ece3.1485>
- 819 Carew, M. E., Nichols, S. J., Batovska, J., St Clair, R., Murphy, N. P., Blacket, M. J., &  
820 Shackleton, M. E. (2017). A DNA barcode database of Australia’s freshwater  
821 macroinvertebrate fauna. *Marine and Freshwater Research*, 68(10), 1788–1802.  
822 <https://doi.org/10.1071/MF16304>
- 823 Carew, M. E., Coleman, R. A., & Hoffmann, A. A. (2018). Can non-destructive DNA  
824 extraction of bulk invertebrate samples be used for metabarcoding? *PeerJ*, 2018(6).  
825 <https://doi.org/10.7717/peerj.4980>
- 826 Carew, M. E., Pettigrove, V. J., Metzeling, L., & Hoffmann, A. A. (2013). Environmental  
827 monitoring using next generation sequencing: Rapid identification of macroinvertebrate  
828 bioindicator species. *Frontiers in Zoology*, 10(1). [https://doi.org/10.1186/1742-9994-10-](https://doi.org/10.1186/1742-9994-10-45)  
829 45
- 830 Clare, E. L., Chain, F. J. J., Littlefair, J. E., & Cristescu, M. E. (2016). The effects of  
831 parameter choice on defining molecular operational taxonomic units and resulting  
832 ecological analyses of metabarcoding data1. *Genome*, 59(11), 981–990.  
833 <https://doi.org/10.1139/gen-2015-0184>
- 834 Clarke, L. J., Beard, J. M., Swadling, K. M., & Deagle, B. E. (2017). Effect of marker choice  
835 and thermal cycling protocol on zooplankton DNA metabarcoding studies. *Ecology and*  
836 *Evolution*, 7(3), 873–883. <https://doi.org/10.1002/ece3.2667>
- 837 Conway, J. R., Lex, A., & Gehlenborg, N. (2017). UpSetR: An R package for the  
838 visualization of intersecting sets and their properties. *Bioinformatics*, 33(18), 2938–  
839 2940. <https://doi.org/10.1093/bioinformatics/btx364>
- 840 Cumberlidge, N., Ng, P. K. L., Yeo, D. C. J., Magalhães, C., Campos, M. R., Alvarez, F., ...  
841 Ram, M. (2009). Freshwater crabs and the biodiversity crisis: Importance, threats, status,  
842 and conservation challenges. *Biological Conservation*, 142(8), 1665–1673.

- 843 <https://doi.org/10.1016/j.biocon.2009.02.038>
- 844 Dallas, H. F. (2007). River Health Programme: South African Scoring System (SASS) Data  
845 Interpretation Guidelines. Institute of Natural Resources and Department of Water  
846 Affairs and Forestry, Pretoria, South Africa. Available online:  
847 [http://www.dwa.gov.za/iwqs/rhp/methods/SASS Interpretation Guidelines.pdf](http://www.dwa.gov.za/iwqs/rhp/methods/SASS%20Interpretation%20Guidelines.pdf)
- 848 Dallas, H. F. (2005). *Inventory of national river health programme monitoring sites: Volume*  
849 *2*. Freshwater Consulting Group / Freshwater Research Unit, University of Cape Town.
- 850 Dallas, H. F., & Rivers-Moore, N. (2014). Ecological consequences of global climate change  
851 for freshwater ecosystems in South Africa. *South African Journal of Science*, *110*(5–6),  
852 1–11. <https://doi.org/10.1590/sajs.2014/20130274>
- 853 Dallas, H. F., & Day, J. A. (2007). *Natural variation in macroinvertebrate assemblages and*  
854 *the development of a biological banding system for interpreting bioassessment data — a*  
855 *preliminary evaluation using data from upland sites in the south-western Cape, South*  
856 *Africa*. 231–244. <https://doi.org/10.1007/s10750-006-0374-y>
- 857 Darwall, W., Smith, K., Tweddle, D., & Skelton, P. (2009). The status and distribution of  
858 freshwater biodiversity in southern Africa. *The IUCN Red List of Threatened Species –*  
859 *Regional Assessment*. Gland: IUCN.
- 860 de Meillon, B., & Wirth, W. (2002). Chapter 3: Ceratopogonidae. In J. Day, A. Harrison, & I.  
861 de Moor (Eds.), *Guides to the freshwater invertebrates of Southern Africa*. Vol. 9:  
862 *Diptera* (pp. 50–56). Water Research Commission Report TT201/02.
- 863 de Moor, F. C. (2002a). Shortcomings and advantages of using rapid biological assessment  
864 techniques for determining the health of rivers in South Africa. *Verhandlungen Des*  
865 *Internationalen Verein Limnologie*, *28*, 651–662.
- 866 de Moor, F. C. (2002b). Chapter 5: Simuliidae. In J. A. Day, A. D. Harrison, & I. de Moor  
867 (Eds.), *Guides to the freshwater invertebrates of Southern Africa*. Vol. 9: *Diptera* (pp. 1–  
868 200). African Water Research Commission Report TT201/02.
- 869 de Moor, F., & Scott, K. (2003). Chapter 5: Trichoptera. In I. de Moor, J. Day, & F. de Moor  
870 (Eds.), *Guides to the Freshwater Invertebrates of Southern Africa*. Volume 8: *Insecta II*.  
871 (pp. 84–169). Water Research Commission.
- 872 Deiner, K., & Altermatt, F. (2014). Transport distance of invertebrate environmental DNA in  
873 a natural river. *PLoS ONE*, *9*(2). <https://doi.org/10.1371/journal.pone.0088786>
- 874 Deiner, K., Bik, H. M., Mächler, E., Seymour, M., Lacoursière-Roussel, A., Altermatt, F., ...  
875 Bernatchez, L. (2017). Environmental DNA metabarcoding: transforming how we

- 876 survey animal and plant communities. *Molecular Ecology*, 26(21), 5872–5895.  
877 <https://doi.org/10.1111/mec.14350>
- 878 Deiner, K., Fronhofer, E. A., Mächler, E., Walser, J. C., & Altermatt, F. (2016).  
879 Environmental DNA reveals that rivers are conveyor belts of biodiversity information.  
880 *Nature Communications*, 7, 12544 . <https://doi.org/10.1038/ncomms12544>
- 881 Deiner, K., Walser, J-C., Mächler, E., & Altermatt, F. (2016). Choice of capture and  
882 extraction methods affect detection of freshwater biodiversity from environmental DNA.  
883 *Biological Conservation*, 183(March), 53-63.  
884 <https://doi.org/10.1016/j.biocon.2014.11.018>
- 885 Delić, T., Trontelj, P., Rendoš, M., & Fišer, C. (2017). *The importance of naming cryptic*  
886 *species and the conservation of endemic subterranean amphipods*. *Scientific Reports*, 7,  
887 3391. <https://doi.org/10.1038/s41598-017-02938-z>
- 888 Dickens, C. W., & Graham, P. M. (2002). The South African Scoring System (SASS)  
889 Version 5 Rapid Bioassessment Method for Rivers. *African Journal of Aquatic Science*,  
890 27(1), 1–10. <https://doi.org/10.2989/16085914.2002.9626569>
- 891 Dowle, E. J., Pochon, X., C Banks, J., Shearer, K., & Wood, S. A. (2016). Targeted gene  
892 enrichment and high-throughput sequencing for environmental biomonitoring: a case  
893 study using freshwater macroinvertebrates. *Molecular Ecology Resources*, 16(5), 1240–  
894 1254. <https://doi.org/10.1111/1755-0998.12488>
- 895 Driver A., Sink, K.J., Nel, J.N., Holness, S., Van Niekerk, L., Daniels, F., Jonas, Z., Majiedt,  
896 P.A., Harris, L and Maze, K. (2012). *National Biodiversity Assessment 2011: An*  
897 *assessment of South Africa's biodiversity and ecosystems. Synthesis Report*.
- 898 Edgar, R. C. (2013). UPARSE: highly accurate OTU sequences from microbial amplicon  
899 reads. *Nature Methods*, 10(10), 996–998. <https://doi.org/10.1038/nmeth.2604>
- 900 Edgar, R. C., & Flyvbjerg, H. (2015). Error filtering, pair assembly and error correction for  
901 next-generation sequencing reads. *Bioinformatics*, 31(21), 3476–3482.  
902 <https://doi.org/10.1093/bioinformatics/btv401>
- 903 Ekrem, T., Stur, E., & Hebert, P. D. N. (2010). Females do count: Documenting  
904 Chironomidae (Diptera) species diversity using DNA barcoding. *Organisms Diversity*  
905 *and Evolution*, 10(5), 397–408. <https://doi.org/10.1007/s13127-010-0034-y>
- 906 Elbrecht, V., & Leese, F. (2015). Can DNA-based ecosystem assessments quantify species  
907 abundance? Testing primer bias and biomass-sequence relationships with an innovative  
908 metabarcoding protocol. *PLoS ONE*, 10(7), 1–16.

- 909 <https://doi.org/10.1371/journal.pone.0130324>
- 910 Elbrecht, V., & Leese, F. (2017). Validation and Development of COI Metabarcoding  
911 Primers for Freshwater Macroinvertebrate Bioassessment. *Frontiers in Environmental*  
912 *Science*, 5(April), 1–11. <https://doi.org/10.3389/fenvs.2017.00011>
- 913 Elbrecht, V., Peinert, B., & Leese, F. (2016). Sorting things out - assessing effects of unequal  
914 specimen biomass on DNA metabarcoding. *PeerJ*, (May), 1–16.  
915 <https://doi.org/10.7287/PEERJ.PREPRINTS.2561V1>
- 916 Elbrecht, V., & Steinke, D. (2018). Scaling up DNA metabarcoding for freshwater  
917 macrozoobenthos monitoring. *Freshwater Biology*, 64, 380-387.  
918 <https://doi.org/10.1111/fwb.13220>
- 919 Elbrecht, V., Vamos, E. E., Meissner, K., Aroviita, J., & Leese, F. (2017). Assessing  
920 strengths and weaknesses of DNA metabarcoding-based macroinvertebrate  
921 identification for routine stream monitoring. *Methods in Ecology and Evolution*, 8,  
922 1265–1275. <https://doi.org/10.1111/2041-210X.12789>
- 923 Elbrecht, V., Vamos, E. E., Steinke, D., & Leese, F. (2017). Assessing intraspecific genetic  
924 diversity from community DNA metabarcoding data. *PeerJ Preprints*, 5, e3269v1.  
925 <https://doi.org/10.7287/peerj.preprints.3269v1>
- 926 Endrödy-Younga, S., & Stals, R. (2008). Chapter 14: Scirtidae. In R. Stals & I. de Moor  
927 (Eds.), *Guides to the Freshwater Invertebrates of Southern Africa. Volume 10:*  
928 *Coleoptera* (pp. 133–138). Water Research Commission.
- 929 Erdozain, M., Thompson, D. G., Porter, T. M., Kidd, K. A., Kreutzweiser, D. P., Sibley, P.  
930 K., ... Hajibabaei, M. (2019). Metabarcoding of storage ethanol vs. conventional  
931 morphometric identification in relation to the use of stream macroinvertebrates as  
932 ecological indicators in forest management. *Ecological Indicators*, 101(September),  
933 173–184. <https://doi.org/10.1016/j.ecolind.2019.01.014>
- 934 Floyd, R., Abebe, E., Papert, A., & Blaxter, M. (2002). Molecular barcodes for soil nematode  
935 identification. *Molecular Ecology*, 11(4), 839–850. [https://doi.org/10.1046/j.1365-](https://doi.org/10.1046/j.1365-294X.2002.01485.x)  
936 [294X.2002.01485.x](https://doi.org/10.1046/j.1365-294X.2002.01485.x)
- 937 Flynn, J. M., Brown, E. A., Chain, F. J. J., Macisaac, H. J., & Cristescu, M. E. (2015).  
938 Toward accurate molecular identification of species in complex environmental samples:  
939 Testing the performance of sequence filtering and clustering methods. *Ecology and*  
940 *Evolution*, 5(11), 2252–2266. <https://doi.org/10.1002/ece3.1497>
- 941 Folmer, O., Black, M., Hoeh, W., Lutz, R., & Vrijenhoek, R. (1994). DNA primers for

- 942 amplification of mitochondrial cytochrome c oxidase subunit I from diverse metazoan  
943 invertebrates. *Molecular Marine Biology and Biotechnology*, 3(5), 294–299. Gardham,  
944 S., Hose, G. C., Stephenson, S., & Chariton, A. A. (2014). DNA Metabarcoding Meets  
945 Experimental Ecotoxicology: Advancing Knowledge on the Ecological Effects of  
946 Copper in Freshwater Ecosystems. In *Advances in Ecological Research* (1st ed., Vol.  
947 51). <https://doi.org/10.1016/B978-0-08-099970-8.00007-5>
- 948 Gibson, J. F., Shokralla, S., Curry, C., Baird, D. J., Monk, W. A., King, I., & Hajibabaei, M.  
949 (2015). Large-scale biomonitoring of remote and threatened ecosystems via high-  
950 throughput sequencing. *PLoS ONE*, 10(10), 1–15.  
951 <https://doi.org/10.1371/journal.pone.0138432>
- 952 Haase, P., Murray-Bligh, J., Lohse, S., Pauls, S., Sundermann, A., Gunn, R., & Clarke, R.  
953 (2006). Assessing the impact of errors in sorting and identifying macroinvertebrate  
954 samples. *Hydrobiologia*, 566(1), 505–521. <https://doi.org/10.1007/s10750-006-0075-6>
- 955 Haase, P., Pauls, S. U., Schindehütte, K., & Sundermann, A. (2010). First audit of  
956 macroinvertebrate samples from an EU Water Framework Directive monitoring  
957 program: human error greatly lowers precision of assessment results. *Journal of the*  
958 *North American Benthological Society*, 29(4), 1279–1291. [https://doi.org/10.1899/09-](https://doi.org/10.1899/09-183.1)  
959 183.1
- 960 Hajibabaei, M., Janzen, D. H., Burns, J. M., Hallwachs, W., & Hebert, P. D. N. (2006). DNA  
961 barcodes distinguish species of tropical Lepidoptera. *Proceedings of the National*  
962 *Academy of Sciences of the United States of America*, 103(4), 968–971.  
963 <https://doi.org/10.1073/pnas.0510466103>
- 964 Hajibabaei, M., Porter, T. M., Robinson, C., Baird, D. J., Shokralla, S., & Wright, M. (2019).  
965 Watered-down biodiversity? A comparison of metabarcoding results from DNA  
966 extracted from matched water and bulk tissue biomonitoring samples. *BioRxiv*, 45(15),  
967 37. <https://doi.org/doi: http://dx.doi.org/10.1101/575928>
- 968 Hajibabaei, M., Shokralla, S., Zhou, X., Singer, G. A. C., & Baird, D. J. (2011).  
969 Environmental barcoding: A next-generation sequencing approach for biomonitoring  
970 applications using river benthos. *PLoS ONE*, 6(4).  
971 <https://doi.org/10.1371/journal.pone.0017497>
- 972 Hamer, M. (2013). *A National Strategy for Zoological Taxonomy (2013 - 2020)* (pp. 1–53).  
973 pp. 1–53. South African National Biodiversity Institute.
- 974 Harrison, A.D. (2004). The Non-biting Midges (Diptera: Chironomidae) of South Africa.

- 975 Rhodes University online checklist.  
976 <https://www.ru.ac.za/media/rhodesuniversity/resources/martin/chironomidae.html>.  
977 Accessed: 23 September 2019
- 978 Harrison, A. ., Prins, A., & Day, J. A. (2002). Chapter 2: Lesser-known Nematocera. In J.  
979 Day, A. Harrison, & F. de Moor (Eds.), Guides to the freshwater invertebrates of  
980 Southern Africa. Vol. 9: Diptera (pp. 1–200). Water Research Commission Report  
981 TT201/02.
- 982 Hebert, P. D. N., Ratnasingham, S., & de Waard, J. R. (2003). Barcoding animal life:  
983 cytochrome c oxidase subunit 1 divergences among closely related species. *Proceedings*  
984 *of the Royal Society B: Biological Sciences*, 270(Suppl\_1), S96–S99.  
985 <https://doi.org/10.1098/rsbl.2003.0025>
- 986 Hering, D., Borja, A., Jones, J. I., Pont, D., Boets, P., Bouchez, A., ... Kelly, M. (2018).  
987 Implementation options for DNA-based identification into ecological status assessment  
988 under the European Water Framework Directive. *Water Research*, 138, 192–205.  
989 <https://doi.org/10.1016/j.watres.2018.03.003>
- 990 Jansen van Rensburg, C., & Day, J. (2002). Chapter 2: Water mites. In I. de Moor, J. Day, &  
991 F. de Moor (Eds.), Guides to the Freshwater Invertebrates of Southern Africa. Volume  
992 6: Arachnida and Mollusca (pp. 23–41). Water Research Commission.
- 993 Kaaya, L., Day, J., & Dallas, H. (2015). Tanzania River Scoring System (TARISS): a  
994 macroinvertebrate-based biotic index for rapid bioassessment of rivers. *African Journal*  
995 *of Aquatic Science*, 40(2), 109–117. <https://doi.org/10.2989/16085914.2015.1051941>
- 996 Kleynhans, C., Thirion, C., & Moolman, J. (2005). *A Level 1 River Ecoregion classification*  
997 *system for South Africa, Lesotho and Swaziland*. Pretoria, South Africa.
- 998 Lejzerowicz, F., Esling, P., Pillet, L., Wilding, T. A., Black, K. D., & Pawlowski, J. (2015).  
999 High-throughput sequencing and morphology perform equally well for benthic  
1000 monitoring of marine ecosystems. *Scientific Reports*, 5(April), 1–10.  
1001 <https://doi.org/10.1038/srep13932>
- 1002 Leray, M., & Knowlton, N. (2017). Random sampling causes the low reproducibility of rare  
1003 eukaryotic OTUs in Illumina COI metabarcoding. *PeerJ*, 5, e3006.  
1004 <https://doi.org/10.7717/peerj.3006>
- 1005 Lex, A., Gehlenborg, N., Strobel, H., Vuillemot, R., Pfister, H., & Manuscript, A. (2014).  
1006 UpSet: Visualization of Intersecting Sets Europe PMC Funders Group. *IEEE Trans Vis*  
1007 *Comput Graph*, 20(12), 1983–1992. <https://doi.org/10.1109/TVCG.2014.2346248>

- 1008 Li, F., Peng, Y., Fang, W., Altermatt, F., Xie, Y., Yang, J., & Zhang, X. (2018). Application  
1009 of Environmental DNA Metabarcoding for Predicting Anthropogenic Pollution in  
1010 Rivers. *Environmental Science and Technology*, *52*(20), 11708–11719.  
1011 <https://doi.org/10.1021/acs.est.8b03869>
- 1012 Macher, J. N., Salis, R. K., Blakemore, K. S., Tollrian, R., Matthaei, C. D., & Leese, F.  
1013 (2016). Multiple-stressor effects on stream invertebrates: DNA barcoding reveals  
1014 contrasting responses of cryptic mayfly species. *Ecological Indicators*, *61*, 159–169.  
1015 <https://doi.org/10.1016/j.ecolind.2015.08.024>
- 1016 Macher, J. N., Vivancos, A., Piggott, J. J., Centeno, F. C., Matthaei, C. D., & Leese, F.  
1017 (2018). Comparison of environmental DNA and bulk-sample metabarcoding using  
1018 highly degenerate cytochrome c oxidase I primers. *Molecular Ecology Resources*, *18*(6),  
1019 1456–1468. <https://doi.org/10.1111/1755-0998.12940>
- 1020 Mächler, E., Little, C. J., Wüthrich, R., Alther, R., & Fronhofer, E. A. (2019). Assessing  
1021 different components of biodiversity across a river network using eDNA. *Environmental*  
1022 *DNA*, *1*, 290–301.
- 1023 Majaneva, M., Diserud, O. H., Eagle, S. H. C., Boström, E., Hajibabaei, M., & Ekrem, T.  
1024 (2018). Environmental DNA filtration techniques affect recovered biodiversity.  
1025 *Scientific Reports*, *8*, 4682. <https://doi.org/10.1038/s41598-018-23052-8>
- 1026 Majaneva, M., Diserud, O. H., Eagle, S. H. C., Hajibabaei, M., & Ekrem, T. (2018). Choice  
1027 of DNA extraction method affects DNA metabarcoding of unsorted invertebrate bulk  
1028 samples. *Metabarcoding and Metagenomics* *2*, e26664.  
1029 <https://doi.org/10.3897/mbmg.2.26664>
- 1030 Martin, M. (2011). Cutadapt removes adapter sequences from high-throughput sequencing  
1031 reads. *EMBnet Journal*, *17*, 10–12.
- 1032 Martins, F. M. S., Galhardo, M., Filipe, A. F., Teixeira, A., Pinheiro, P., Paupério, J., ...  
1033 Beja, P. (2019). Have the cake and eat it: Optimizing nondestructive DNA  
1034 metabarcoding of macroinvertebrate samples for freshwater biomonitoring. *Molecular*  
1035 *Ecology Resources*, *19*(4), 863–876. <https://doi.org/10.1111/1755-0998.13012>
- 1036 Nel, J., Driver, A., Strydom, W. F., Maherry, A., Petersen, C., Hill, L., ... Smith-Adao, L. B.  
1037 (2011). *Atlas of freshwater ecosystem priority areas in South Africa*. WRC Report  
1038 number: K5/1801
- 1039 Nelson, H. (2008). Chapter 15: Elmidae. In R. Stals & I. de Moor (Eds.), *Guides to the*  
1040 *Freshwater Invertebrates of Southern Africa*. Volume 10: Coleoptera (pp. 139–152).



- 1041 Water Research Commission.
- 1042 Odume, O. N., Muller, W. J., Arimoro, F. O., & Palmer, C. G. (2012). The impact of water  
1043 quality deterioration on macroinvertebrate communities in the Swartkops River, South  
1044 Africa: A multimetric approach. *African Journal of Aquatic Science*, 37(2), 191–200.  
1045 <https://doi.org/10.2989/16085914.2012.670613>
- 1046 Odume, O. N., Palmer, C. G., Arimoro, F. O., & Mensah, P. K. (2015). Influence of selected  
1047 biotopes on chironomid-based bioassessment of the swartkops river, Eastern Cape,  
1048 South Africa. *Water SA*, 41(3), 343–358. <https://doi.org/10.4314/wsa.v41i3.06>
- 1049 Omernik, J. M. (1987). Ecoregions of the Conterminous United States. *Annals of the*  
1050 *Association of American Geographers*, 77(1), 118–125. <https://doi.org/10.1111/j.1467->  
1051 [8306.1987.tb00149.x](https://doi.org/10.1111/j.1467-8306.1987.tb00149.x)
- 1052 Packer, L., Gibbs, J., Sheffield, C., & Hanner, R. (2009). DNA barcoding and the mediocrity  
1053 of morphology. *Molecular Ecology Resources*, 9, 42–50. <https://doi.org/10.1111/j.1755->  
1054 [0998.2009.02631.x](https://doi.org/10.1111/j.1755-0998.2009.02631.x)
- 1055 Palmer, R. W., & Taylor, E. D. (2004). The Namibian Scoring System (NASS) version 2  
1056 rapid bio-assessment method for rivers. *African Journal of Aquatic Science*, 29(2), 229–  
1057 234. <https://doi.org/10.2989/16085910409503814>
- 1058 Park, D. S., Foottit, R., Maw, E., & Hebert, P. D. N. (2011). Barcoding bugs: DNA-based  
1059 identification of the true bugs (Insecta: Hemiptera: Heteroptera). *PLoS ONE*, 6(4).  
1060 <https://doi.org/10.1371/journal.pone.0018749>
- 1061 Pauls, S. U., Alp, M., Bálint, M., Bernabò, P., Čiampor, F., Čiamporová-Zaťovičová, Z., ...  
1062 Monaghan, M. T. (2014). Integrating molecular tools into freshwater ecology:  
1063 Developments and opportunities. *Freshwater Biology*, 59(8), 1559–1576.  
1064 <https://doi.org/10.1111/fwb.12381>
- 1065 Piñol, J., San Andrés, V., Clare, E. L., Mir, G., & Symondson, W. O. C. (2014). A pragmatic  
1066 approach to the analysis of diets of generalist predators: The use of next-generation  
1067 sequencing with no blocking probes. *Molecular Ecology Resources*, 14(1), 18–26.  
1068 <https://doi.org/10.1111/1755-0998.12156>
- 1069 Pochardt, M., Allen, J. M., Hart, T., Miller, S. D. L., & Yu, D. W. (2019). Environmental  
1070 DNA for indigenous-led monitoring of a culturally important fish. bioRxiv 620500.  
1071 <https://doi.org/10.1101/620500>
- 1072 Porter, T. M., & Hajibabaei, M. (2018). Over 2.5 million COI sequences in GenBank and  
1073 growing. *PLoS ONE*, 13(9), 1–16. <https://doi.org/10.1371/journal.pone.0200177>

- 1074 R Core Team. (2019). *R: A language and environment for statistical computing*. Retrieved  
1075 from <http://www.r-project.org/>
- 1076 Ratnasingham, S., & Herbert, P. (2007). The Barcode of Life Data System BOLD :  
1077 ([www.barcodinglife.org](http://www.barcodinglife.org)). *Molecular Ecology Notes*, 7, 355–364.  
1078 <https://doi.org/10.1111/j.1471-8286.2006.01678.x>
- 1079 Samways, M., & Wilmot, B. (2003). Chapter 3: Odonata. In I. de Moor, J. Day, & F. de Moor  
1080 (Eds.), *Guides to the Freshwater Invertebrates of Southern Africa. Volume 7: Insecta I:*  
1081 *Ephemeroptera, Odonata & Plecoptera* (pp. 160–200). Water Research Commission.
- 1082 Smith, M. A., Bertrand, C., Crosby, K., Eveleigh, E. S., Fernandez-triana, J., Fisher, B. L., ...  
1083 Packer, L. (2012). *Wolbachia and DNA Barcoding Insects : Patterns, Potential, and*  
1084 *Problems. PLoS ONE* 7(5), e36514. <https://doi.org/10.1371/journal.pone.0036514>
- 1085 Stals, R. (2008). Chapter 3: Gyrinidae. In R. Stals & I. J. de Moor (Eds.), *Guides to the*  
1086 *Freshwater Invertebrates of Southern Africa. Volume 10: Coleoptera* (pp. 53–58). Water  
1087 Research Commission.
- 1088 Stein, E. D., White, B. P., Mazor, R. D., Jackson, J. K., Battle, J. M., Miller, P. E., ...  
1089 Sweeney, B. W. (2014). Does DNA barcoding improve performance of traditional  
1090 stream bioassessment metrics? *Freshwater Science*, 33(1), 302–311.  
1091 <https://doi.org/10.1086/674782>
- 1092 Stevens, D., & Picker, M. D. (2003). Chapter 4: Plecoptera. In I. de Moor, J. Day, & F. de  
1093 Moor (Eds.), *Guides to the Freshwater Invertebrates of Southern Africa. Volume 7:*  
1094 *Insecta I: Ephemeroptera, Odonata & Plecoptera* (pp. 213–263). Water Research  
1095 Commission.
- 1096 Stork, N. E. (2018). How Many Species of Insects and Other Terrestrial Arthropods Are  
1097 There on Earth? *Annual Review of Entomology*, 63(1), 31–45.  
1098 <https://doi.org/10.1146/annurev-ento-020117-043348>
- 1099 Sweeney, B. W., Battle, J. M., Jackson, J. K., & Dapkey, T. (2011). Can DNA barcodes of  
1100 stream macroinvertebrates improve descriptions of community structure and water  
1101 quality? *Journal of the North American Benthological Society*, 30(1), 195–216.  
1102 <https://doi.org/10.1899/10-016.1>
- 1103 Thirion, C. (2007). Module E: Macroinvertebrate Response Assessment Index (MIRAI) in  
1104 River EcoClassification. *Department of Water Affairs and Forestry, South Africa*.  
1105 Retrieved from  
1106 <http://www.dwa.gov.za/RDM/projects/EcoStatus/EcostatusModuleEMar07.pdf>

- 1107 Van Hoven, W., & Day, J. . (2002). Chapter 13: Oligochaeta. In J. Day & I. de Moor (Eds.),  
1108 Guides to the Freshwater Invertebrates of Southern Africa, Volume 5: Nonarthropods  
1109 (Protozoans, Porifera, Cnidaria, Plathyhelminthes, Nemertea, Rotifera, Nematoda,  
1110 Nematomorpha, Gastrotrichia, Bryozoa, Tardigrada, Polychaeta, Oligochaeta and  
1111 Hirudinea) (pp. 203–236). Water Research Commission Report TT167/02.
- 1112 Venter, H. J., & Bezuidenhout, C. C. (2016). DNA-based identification of aquatic  
1113 invertebrates - Useful in the South African context? *South African Journal of Science*,  
1114 112(5–6), 4–7. <https://doi.org/10.17159/sajs.2016/20150444>
- 1115 Weigand, H., Beermann, A. J., Čiampor, F., Costa, F. O., Csabai, Z., Duarte, S., ... Ekrem, T.  
1116 (2019). DNA barcode reference libraries for the monitoring of aquatic biota in Europe:  
1117 Gap-analysis and recommendations for future work. *Science of the Total Environment*,  
1118 678, 499–524. <https://doi.org/10.1016/j.scitotenv.2019.04.247>
- 1119 Yu, D. W., Ji, Y., Emerson, B. C., Wang, X., Ye, C., Yang, C., & Ding, Z. (2012).  
1120 Biodiversity soup: Metabarcoding of arthropods for rapid biodiversity assessment and  
1121 biomonitoring. *Methods in Ecology and Evolution*, 3(4), 613–623.  
1122 <https://doi.org/10.1111/j.2041-210X.2012.00198.x>
- 1123 Zimmermann, J., Glöckner, G., Jahn, R., Enke, N., & Gemeinholzer, B. (2015).  
1124 Metabarcoding vs. morphological identification to assess diatom diversity in  
1125 environmental studies. *Molecular Ecology Resources*, 15(3), 526–542.  
1126 <https://doi.org/10.1111/1755-0998.12336>
- 1127 Zizka, V. M. A., Leese, F., Peinert, B., & Geiger, M. F. (2019). DNA metabarcoding from  
1128 sample fixative as a quick and voucher-preserving biodiversity assessment method.  
1129 *Genome*, 62(3), 122–136. <https://doi.org/10.1139/gen-2018-0048>
- 1130
